# Supplementary material for: Room temperature iron(ii)-catalyzed radical cyclization of unsaturated oximes with hypervalent iodine reagents
Source: Royal Society of Chemistry journal article supplement (doi:10.1039/c9ob02424g), 2019-12-19

## *Supporting Information*

### **Room temperature iron(II)-catalyzed radical cyclization of unsaturated oximes with hypervalent iodine reagents**

Shichao Yang,<sup>a</sup> Hongji Li,<sup>\*,a</sup> Pinhua Li,<sup>a</sup> Jingya Yang,<sup>a</sup> and Lei Wang<sup>\*,a,b</sup>

<sup>a</sup> Department of Chemistry, Huaibei Normal University, Huaibei, Anhui 235000, P R China, Tel: +86-561-3802-069 Fax: +86-561-3090-518 E-mail: hongjili@chnu.edu.cn; leiwang88@hotmail.com

<sup>b</sup> State Key Laboratory of Organometallic Chemistry, Shanghai Institute of Organic Chemistry, Chinese Academy of Sciences, Shanghai 200032, P R China

#### *Table of Contents for Supporting Information*

|                                                                         |    |
|-------------------------------------------------------------------------|----|
| 1. General considerations.....                                          | 1  |
| 2. Typical procedure for the diverse transformations of <b>3a</b> ..... | 1  |
| 3. Mechanistic studies.....                                             | 4  |
| 4. <sup>1</sup> H and <sup>13</sup> C NMR spectra of the products ..... | 6  |
| 5. The crystallographic data for compounds <b>3a</b> .....              | 45 |

## 1. General Considerations

The starting materials, such as oximes and hydroxysulfonyl iodobenzene reagents, are prepared according to the reported methods, respectively [(a)Y. He, L. Li, Y. Yang, Y. Wang, J. Luo, X. Liu and Y. Liang, *Chem. Commun.*, 2013, **49**, 5687.; (b) E. A. Merritt, V. M. T. Carneiro, L. F. Silva Jr. and B. Olofsson, *J. Org. Chem.* 2010, **75**, 7416]. All the solvents were dried and freshly distilled prior to use. Products were purified by flash chromatography on silica gels, eluting with petroleum ether/ethyl acetate (3:1 to 9:1).

## 2. Typical procedure for the diverse transformations of 3a

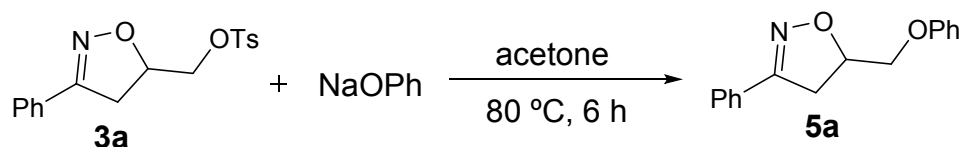

(1) A 10 mL reaction tube was charged with **3a** (66.3 mg, 0.20 mmol), NaOPh (46.4 mg, 0.40 mmol), Then acetone (1.0 mL) was added to the resulted mixture. The reaction tube was placed at 80 °C for 6 h. After that, the mixture in reaction tube was detected by TLC. After the reaction was completed, distilled water (10 mL) was added into the mixture, and extracted with dichloromethane (DCM, 3×10 mL). The organic layers were combined, dried over Na<sub>2</sub>SO<sub>4</sub>, and concentrated under reduced pressure to yield the crude product, which was purified by flash chromatography (silica gel, petroleum ether/ethyl acetate = 3:1 to 9:1), affording the desired product **5a** as a white solid (38.5 mg, 76% yield).

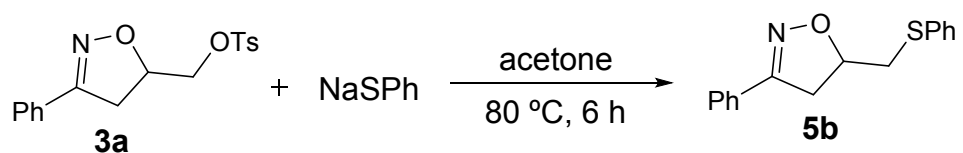

(2) A 10 mL reaction tube was charged with **3a** (66.3 mg, 0.20 mmol), NaSPh (52.9 mg, 0.40 mmol), Then acetone (1.0 mL) was added to the resulted mixture. The reaction tube was placed at 80 °C for 6 h. Then the mixture in reaction tube was

detected by TLC. After the reaction was completed, distilled water (10 mL) was added into the mixture, and extracted with dichloromethane (DCM, 3×10 mL). The organic layers were combined, dried over Na<sub>2</sub>SO<sub>4</sub>, and concentrated under reduced pressure to yield the crude product, which was purified by flash chromatography (silica gel, petroleum ether/ethyl acetate = 3:1 to 9:1), affording the desired product **5b** as a white solid (47.9 mg, 89 % yield).

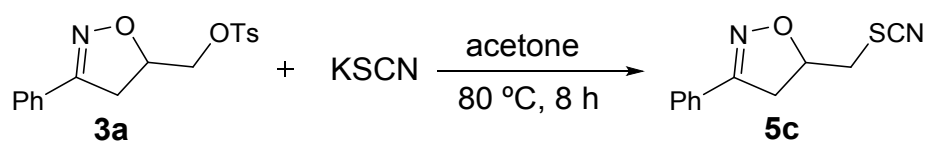

(3) A 10 mL reaction tube was charged with **3a** (66.3 mg, 0.20 mmol), KSCN (38.9 mg, 0.40 mmol), Then acetone (1.0 mL) was added to the resulted mixture. The reaction tube was placed at 80 °C for 8 h. Then, the mixture in reaction tube was detected by TLC. After the reaction was completed, distilled water (10 mL) was added into the mixture, and extracted with dichloromethane (DCM, 3×10 mL). The organic layers were combined, dried over Na<sub>2</sub>SO<sub>4</sub>, and concentrated under reduced pressure to yield the crude product, which was purified by flash chromatography (silica gel, petroleum ether/ethyl acetate = 3:1 to 9:1), affording the desired product **5c** as a white solid (37.5 mg, 86 % yield).

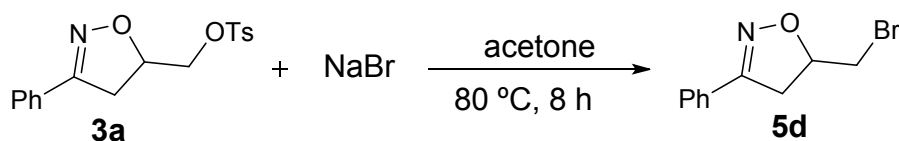

(4) A 10 mL reaction tube was charged with **3a** (66.3 mg, 0.20 mmol), NaBr (41.2 mg, 0.40 mmol), Then acetone (1.0 mL) was added to the resulted mixture. The reaction tube was placed at 80 °C for 8 h. Then, the mixture in reaction tube was detected by TLC. After the reaction was completed, distilled water (10 mL) was added into the mixture, and extracted with dichloromethane (DCM, 3×10 mL). The organic layers were combined, dried over Na<sub>2</sub>SO<sub>4</sub>, and concentrated under reduced pressure to yield the crude product, which was purified by flash chromatography

(silica gel, petroleum ether/ethyl acetate = 3:1 to 9:1), affording the desired product **5d** as a white solid (38.4 mg, 80 % yield).

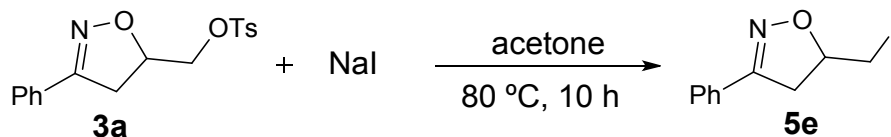

(5) A 10 mL reaction tube was charged with **3a** (66.3 mg, 0.20 mmol), NaI (60.0 mg, 0.40 mmol), Then acetone (1.0 mL) was added to the resulted mixture. The reaction tube was placed at 80 °C for 10 h. Then, the mixture in reaction tube was detected by TLC. After the reaction was completed, distilled water (10 mL) was added into the mixture, and extracted with dichloromethane (DCM, 3×10 mL). The organic layers were combined, dried over Na<sub>2</sub>SO<sub>4</sub>, and concentrated under reduced pressure to yield the crude product, which was purified by flash chromatography (silica gel, petroleum ether/ethyl acetate = 3:1 to 9:1), affording the desired product **5e** as a white solid (54.5mg, 95 % yield).

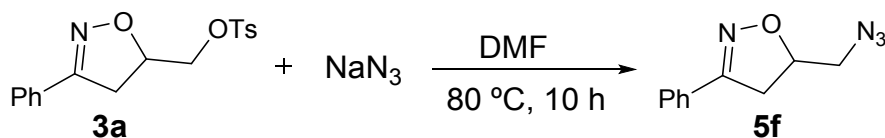

(6) A 10 mL reaction tube was charged with **3a** (66.3 mg, 0.20 mmol), NaN<sub>3</sub> (26.0 mg, 0.30 mmol), Then DMF (1.0 mL) was added to the resulted mixture. The reaction tube was placed at 80 °C for 10 h. Then, the mixture in reaction tube was detected by TLC. After the reaction was completed, distilled water (10 mL) was added into the mixture, and extracted with dichloromethane (DCM, 3×10 mL). The organic layers were combined, dried over Na<sub>2</sub>SO<sub>4</sub>, and concentrated under reduced pressure to yield the crude product, which was purified by flash chromatography (silica gel, petroleum ether/ethyl acetate = 3:1 to 9:1), affording the desired product **5f** as a white solid (36.0 mg, 89 % yield).

### 3. Mechanistic studies

#### (1) TEMPO experiment

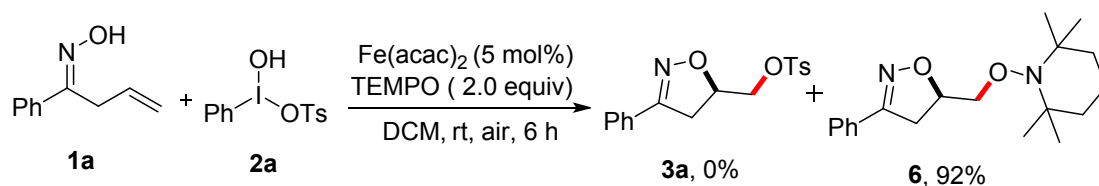

The reaction was carried out according to typical procedure for the synthesis of **3a**, except TEMPO (62.5 mg, 2.0 equiv) was used. The mixture was stirred at room temperature for 6 h. Then, the mixture in reaction tube was detected by TLC. After the reaction was completed, distilled water (10 mL) was added into the mixture, and extracted with dichloromethane (DCM, 3×10 mL). The organic layers were combined, dried over  $\text{Na}_2\text{SO}_4$ , and concentrated under reduced pressure to yield the crude product, which was purified by flash chromatography (silica gel, petroleum ether/ethyl acetate = 3:1 to 9:1), affording the product **6** as a white solid (58.2 mg, 92% yield).

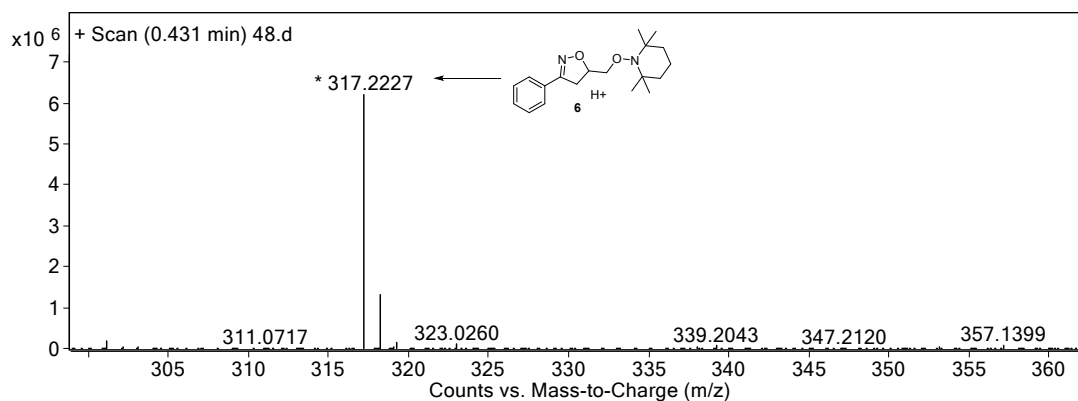

#### (2) The control experiments

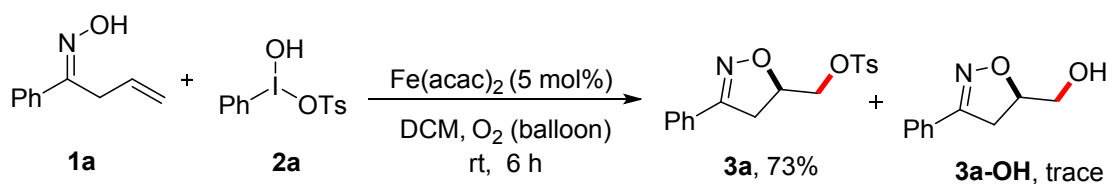

The reaction was carried out according to typical procedure for the synthesis of **3a**, except O<sub>2</sub> (balloon) was used. The mixture was stirred at room temperature for 6 h. Then, the mixture in reaction tube was detected by TLC. After the reaction was completed, distilled water (10 mL) was added into the mixture, and extracted with dichloromethane (DCM, 3×10 mL). The organic layers were combined, dried over Na<sub>2</sub>SO<sub>4</sub>, and concentrated under reduced pressure to yield the crude product, which was purified by flash chromatography (silica gel, petroleum ether/ethyl acetate = 3:1 to 9:1), affording the product **3a** as a white solid (48.4 mg, 73% yield).

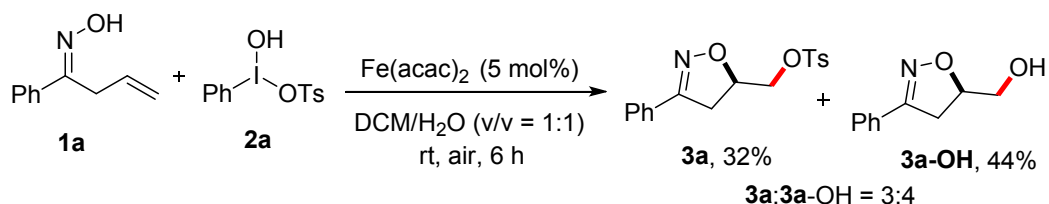

A 10 mL Reaction tube was charged with (*E*)-1-phenylbut-3-en-1-one oxime (**1a**, 32.2 mg, 0.2 mmol), Fe(acac)<sub>2</sub> (2.5 mg, 5 mmol %), DCM/H<sub>2</sub>O (v/v = 1:1, 1.0 mL) and [hydroxy(tosyloxy)iodo]benzene (**2a**, 98.1 mg, 0.25 mmol) was added to the resulted mixture. The reaction tube was placed at room temperature for 6 h. Then, the mixture in reaction tube was detected by TLC. After the reaction was completed, distilled water (10 mL) was added into the mixture, and extracted with dichloromethane (DCM, 3×10 mL). The organic layers were combined, dried over Na<sub>2</sub>SO<sub>4</sub>, and concentrated under reduced pressure to yield the crude product, which was purified by flash chromatography (silica gel, petroleum ether/ethyl acetate = 3:1 to 9:1), affording the desired product **3a** as a white solid (21.2 mg, 32% yield), as well as **3a-OH** as white solid (15.6 mg, 44% yield).

## 4. $^1\text{H}$ and $^{13}\text{C}$ NMR spectra of the products

YSC-H

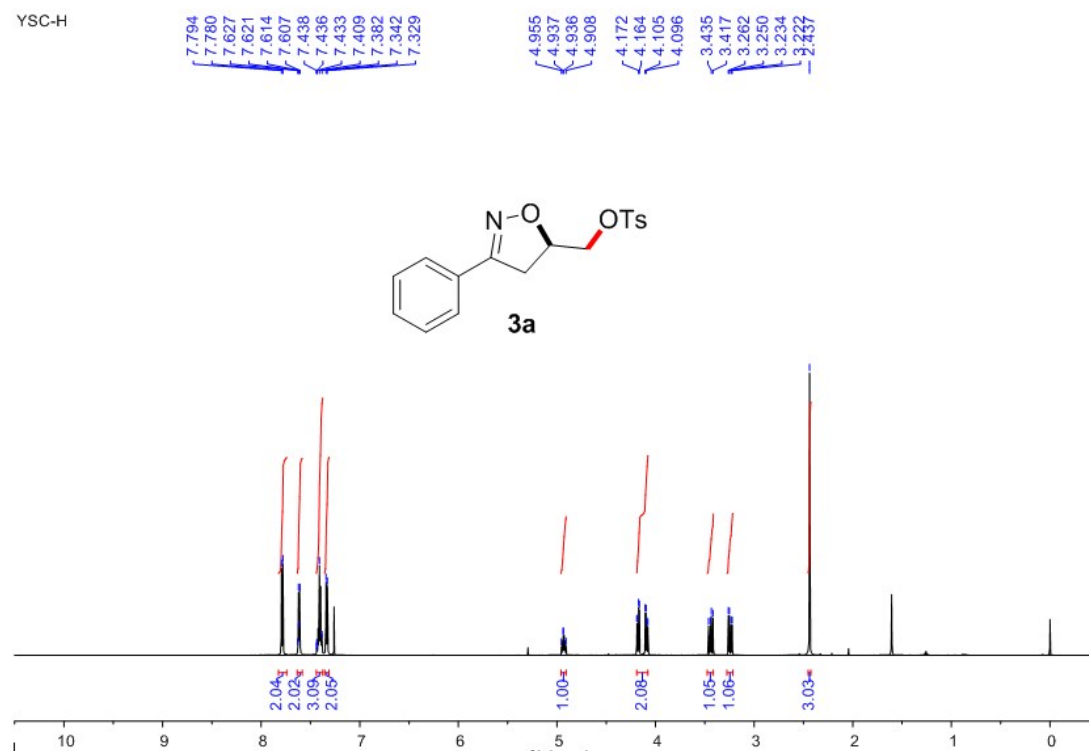

YSC-C

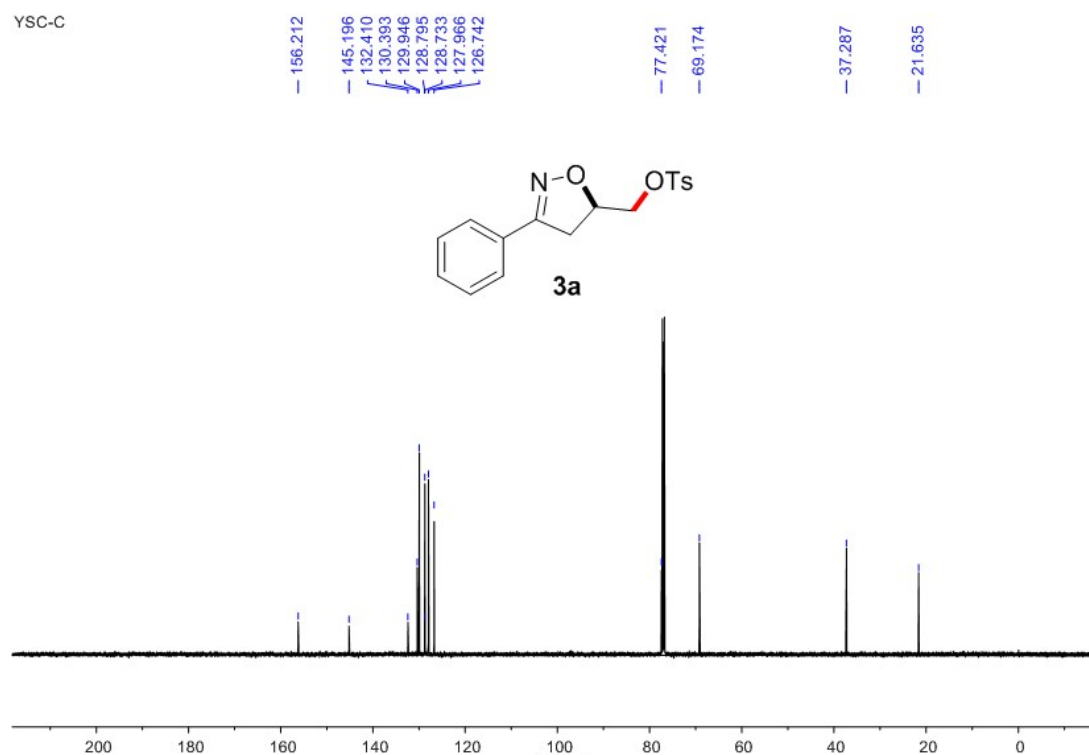

YSC-50

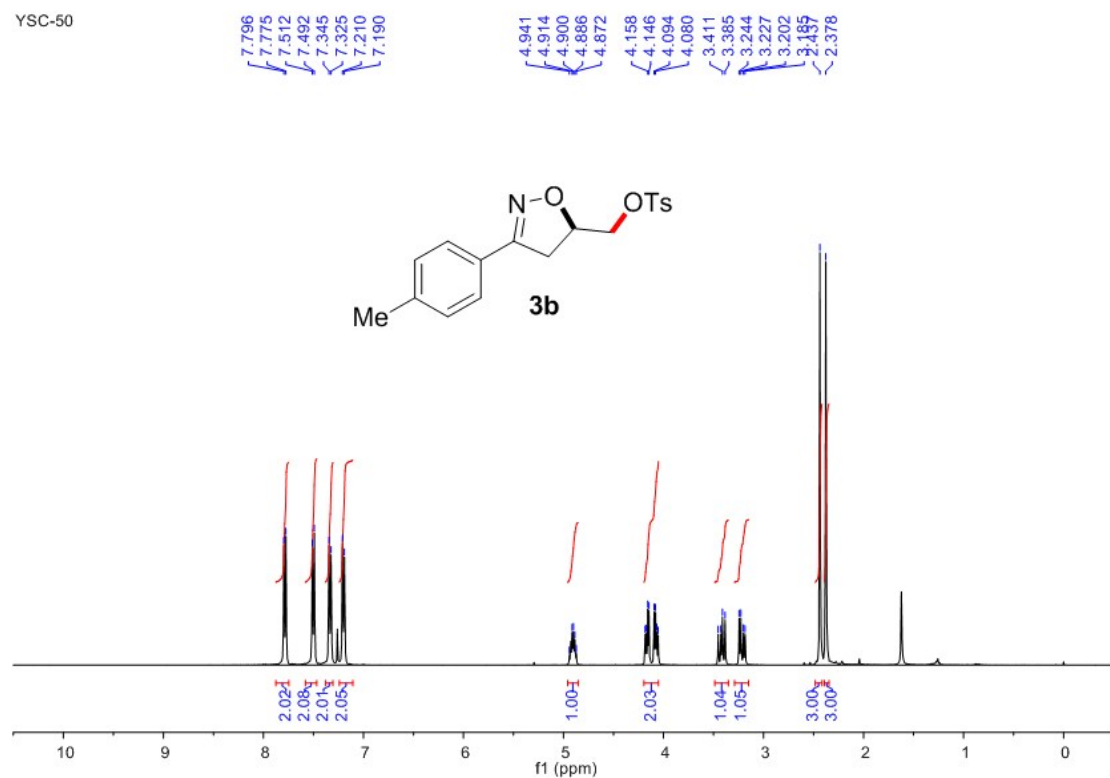

YSC-50

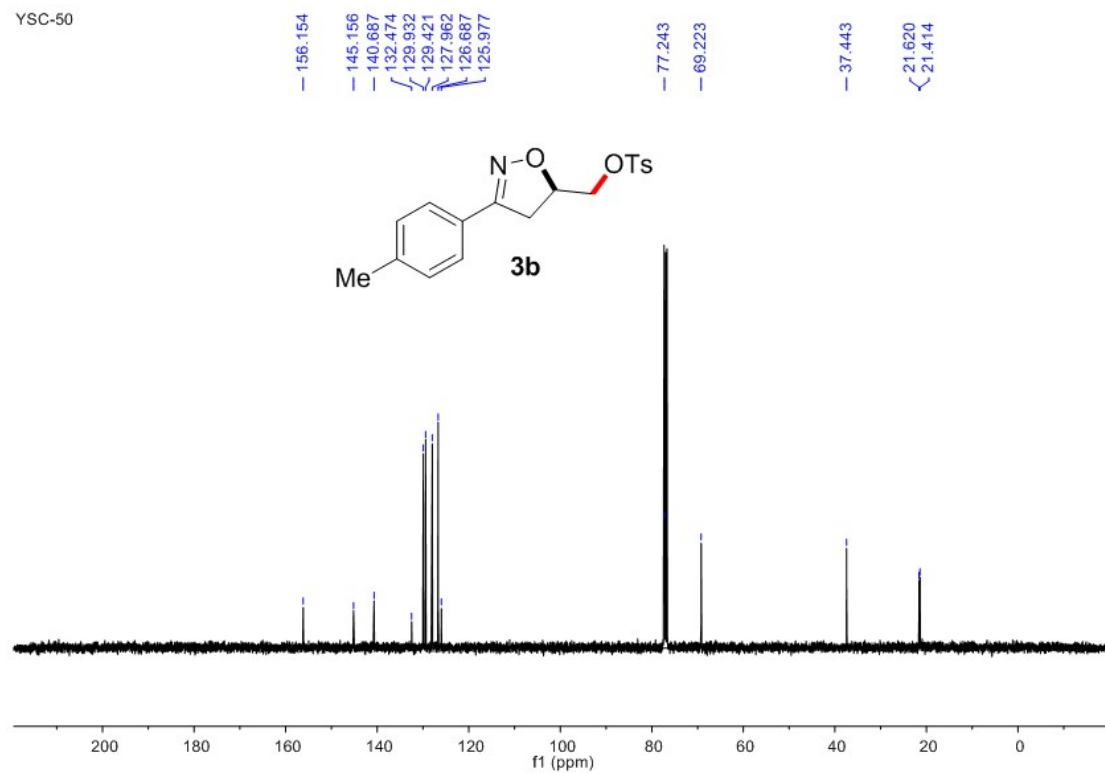



ysc-41

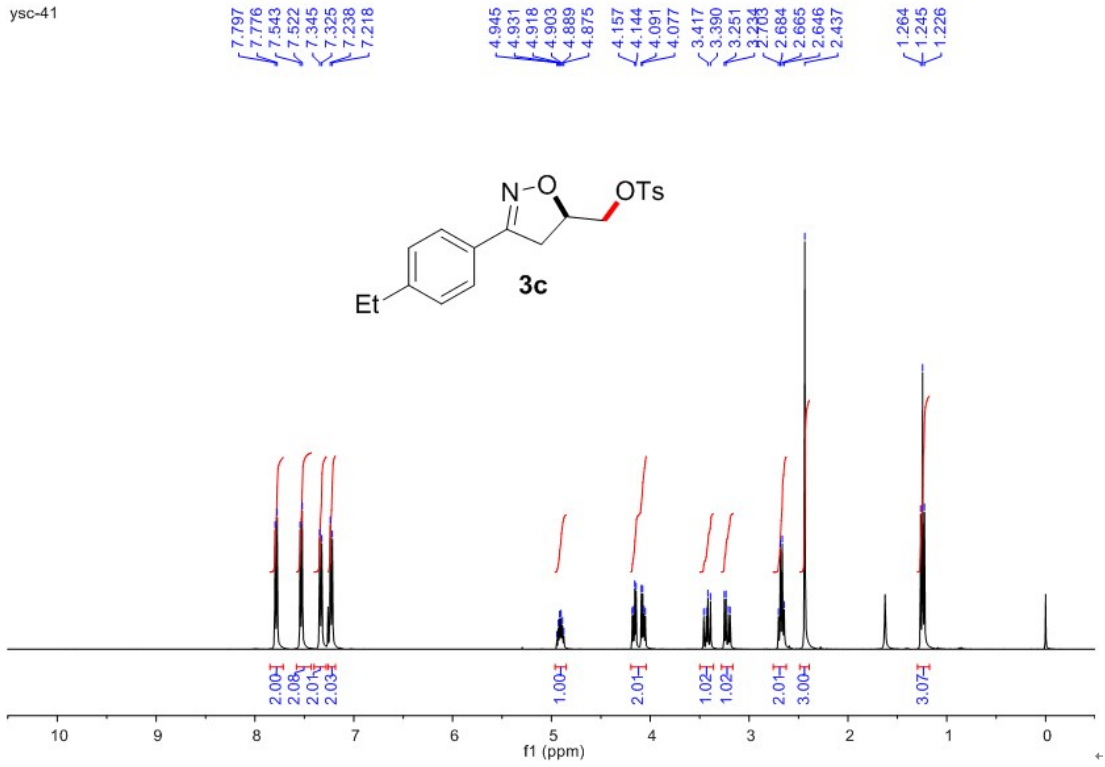

ysc-41

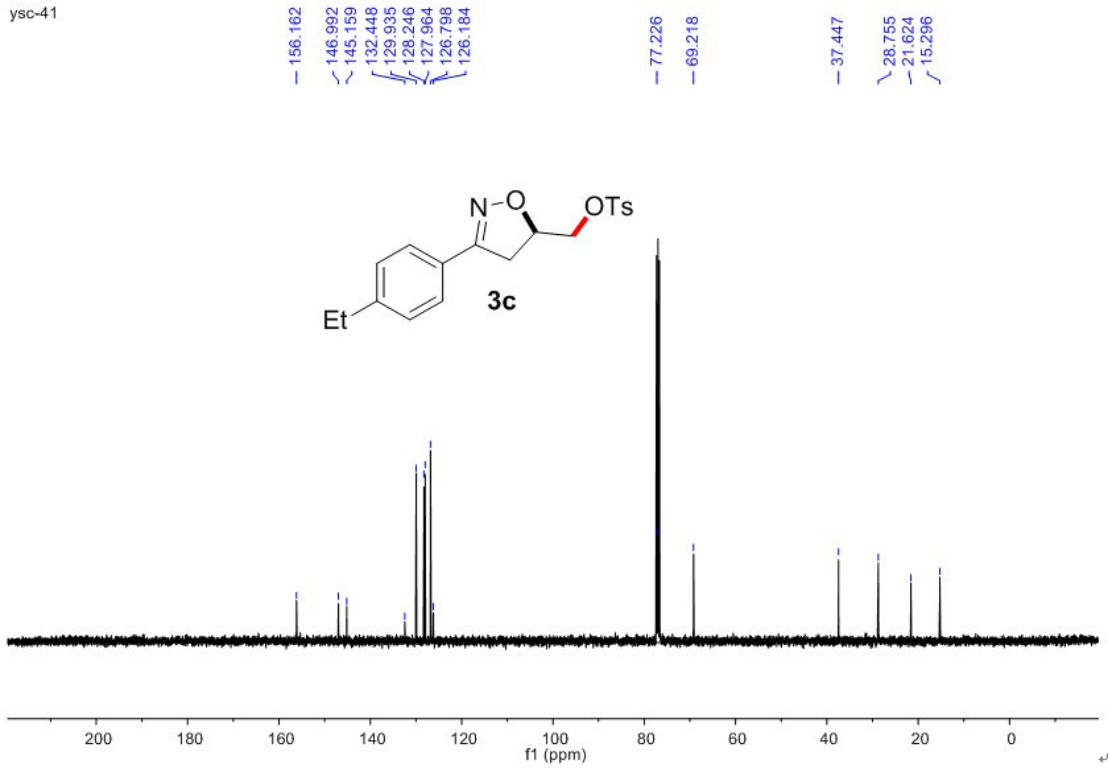

ysc-22

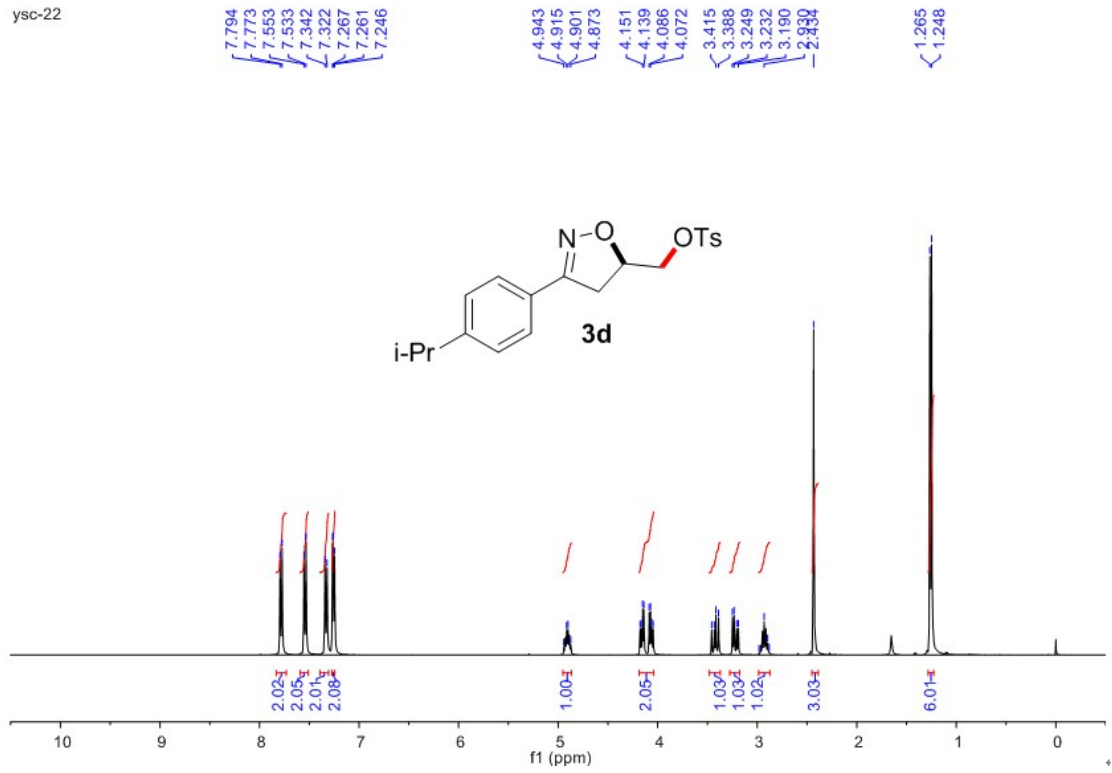

YSC-22

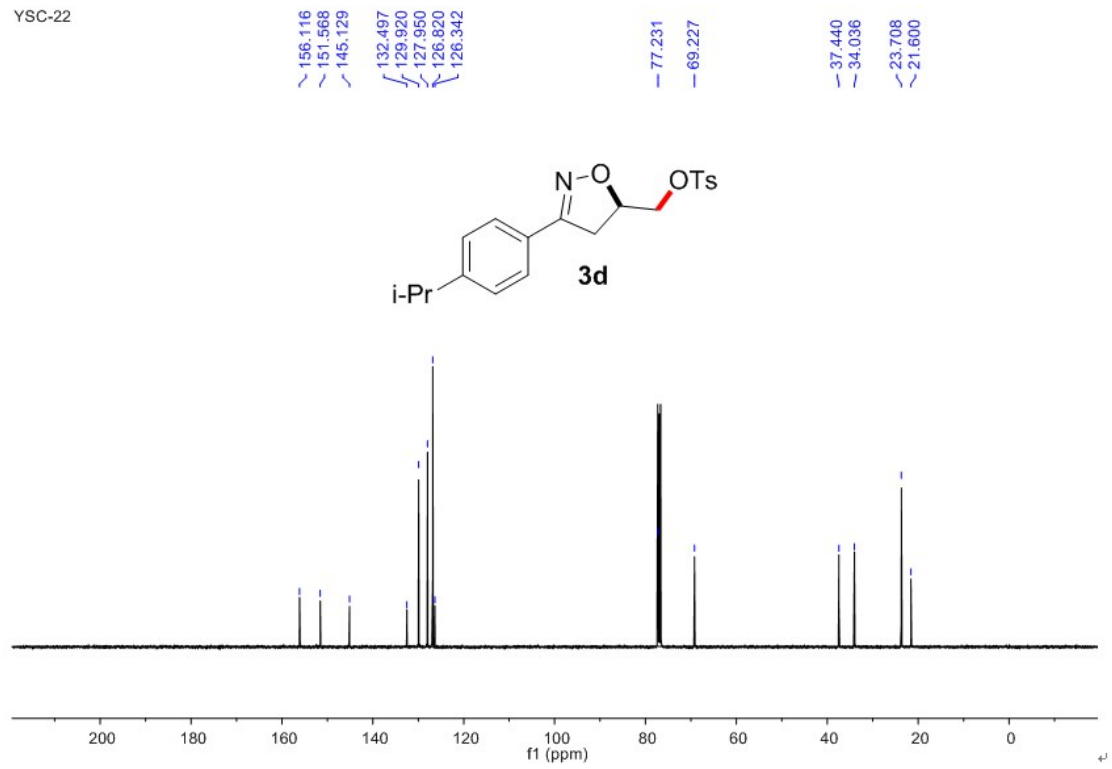

ysc-25

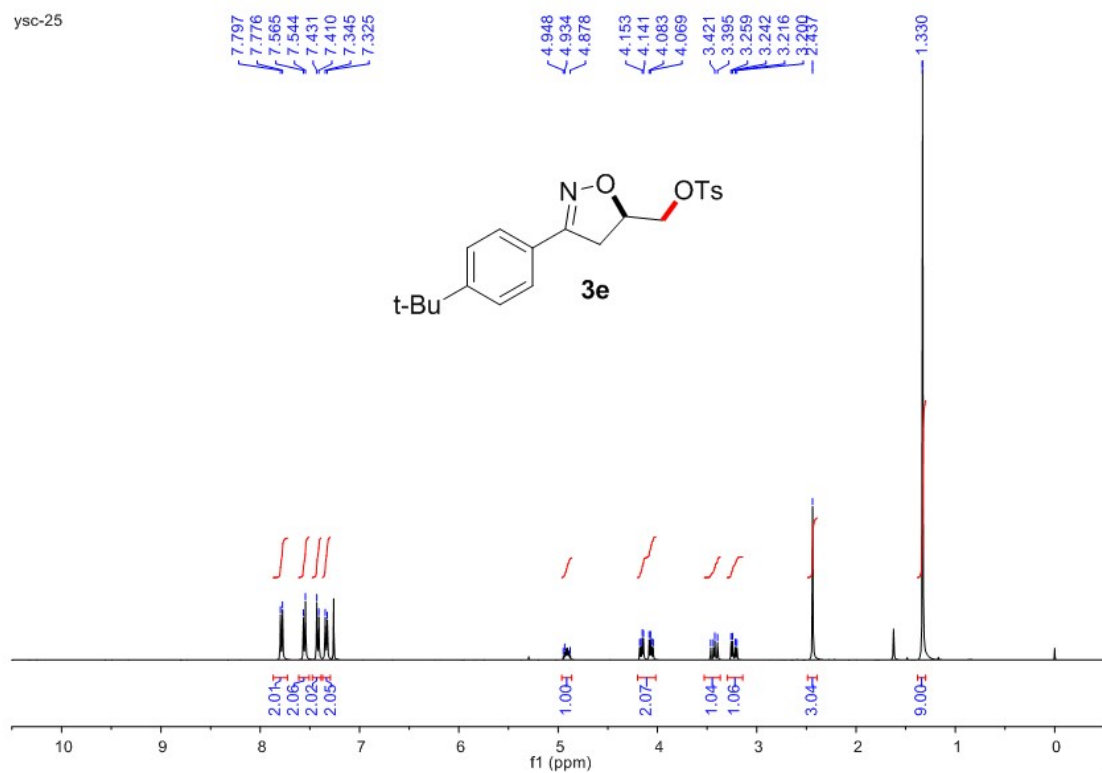

YSC-25

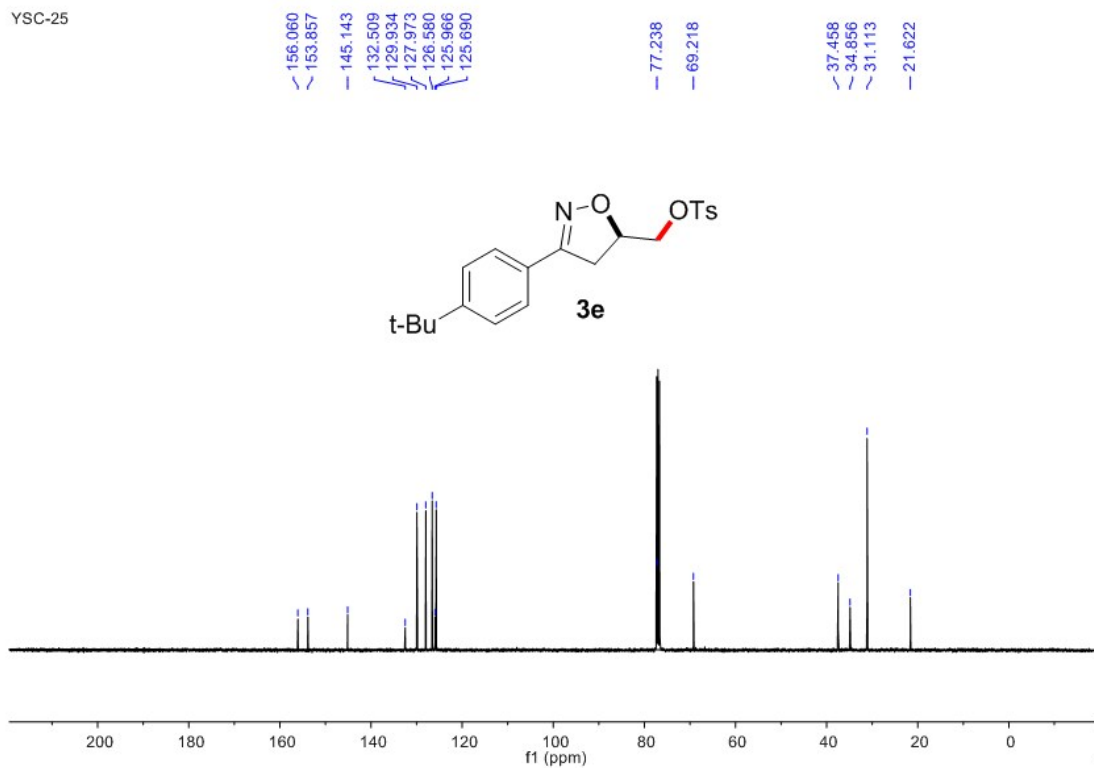

ysc-43

7.801  
7.780  
7.568  
7.547  
7.351  
7.331  
6.924  
6.902  
4.934  
4.892  
4.864  
4.183  
4.156  
4.144  
4.074  
3.843  
3.410  
3.383  
3.248  
3.231  
2.998

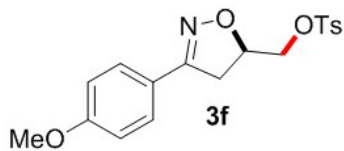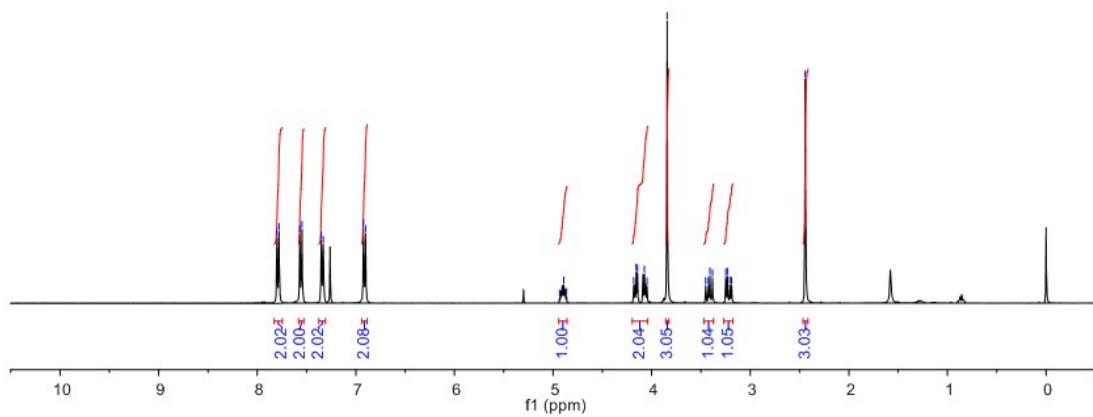

the-ysc-C

161.296  
155.765  
145.170  
129.951  
128.322  
127.991  
121.361  
114.169  
77.142  
69.226  
55.364  
37.624  
21.650

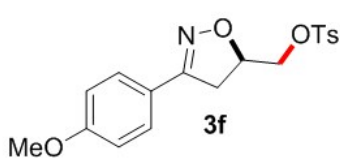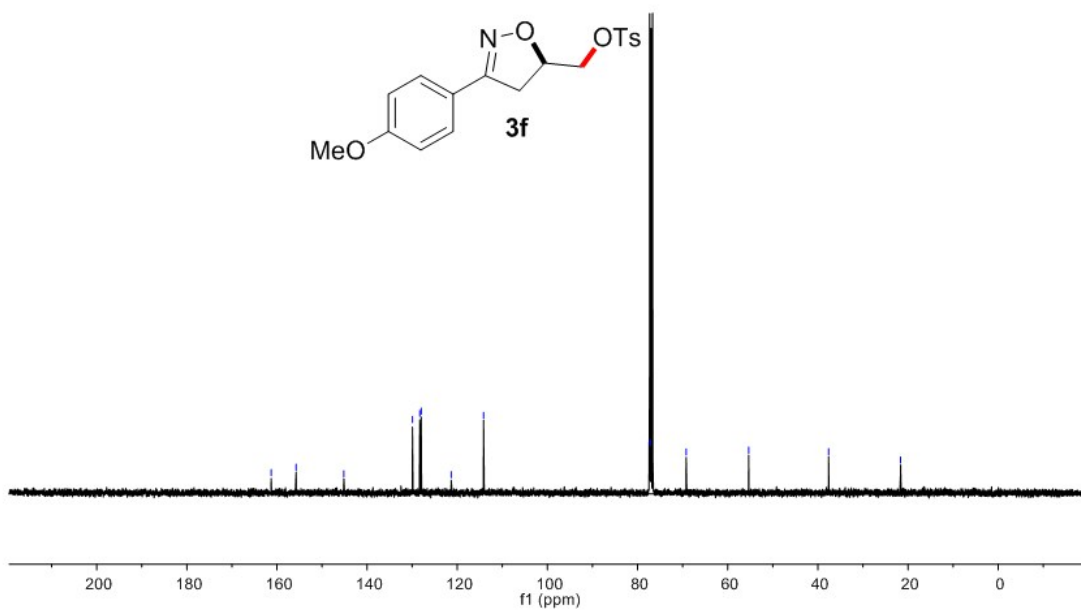

YSC-16

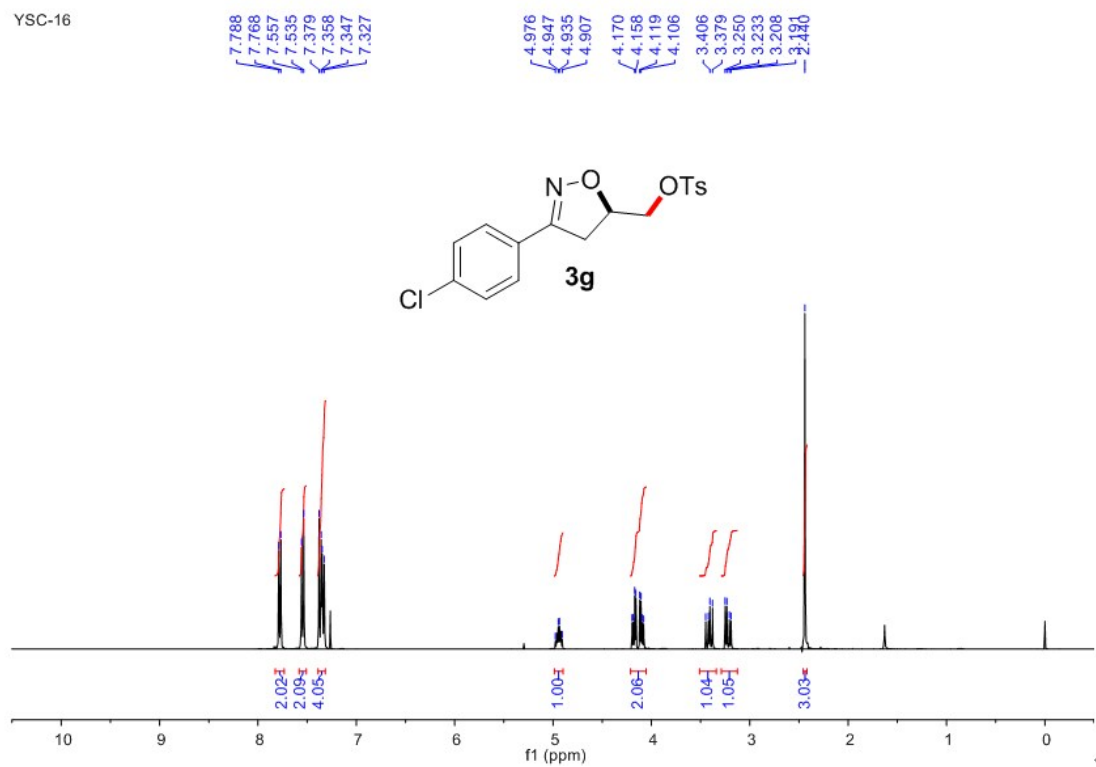

YSC-16

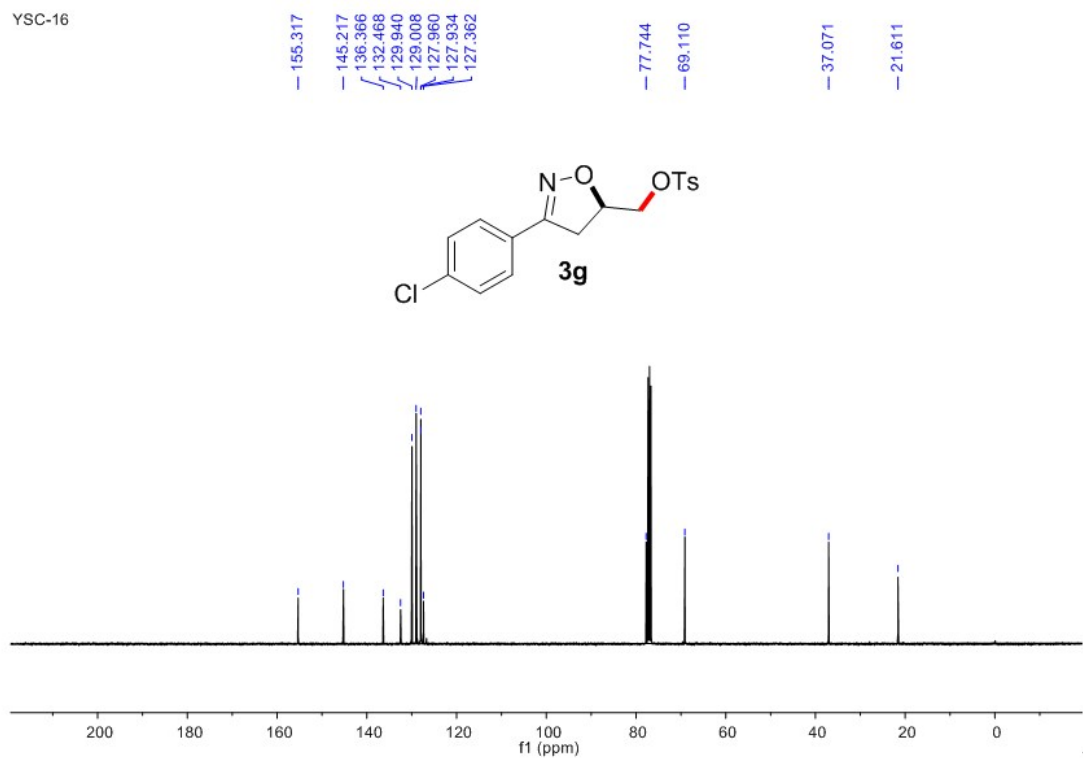

YSC-17

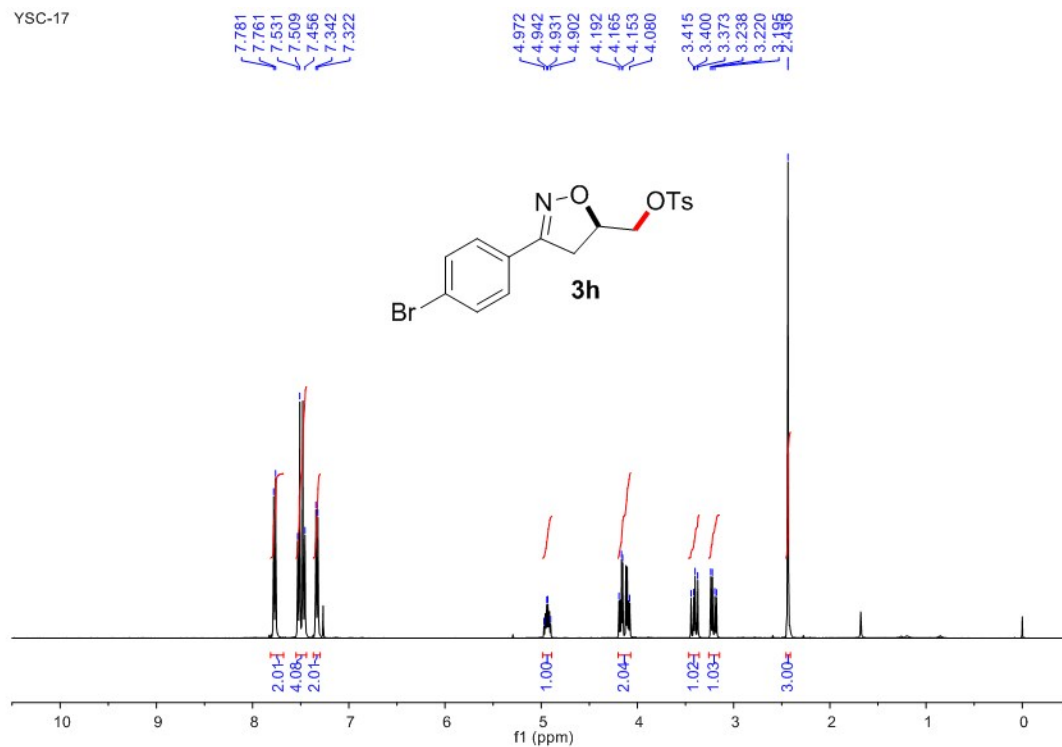

YSC-17

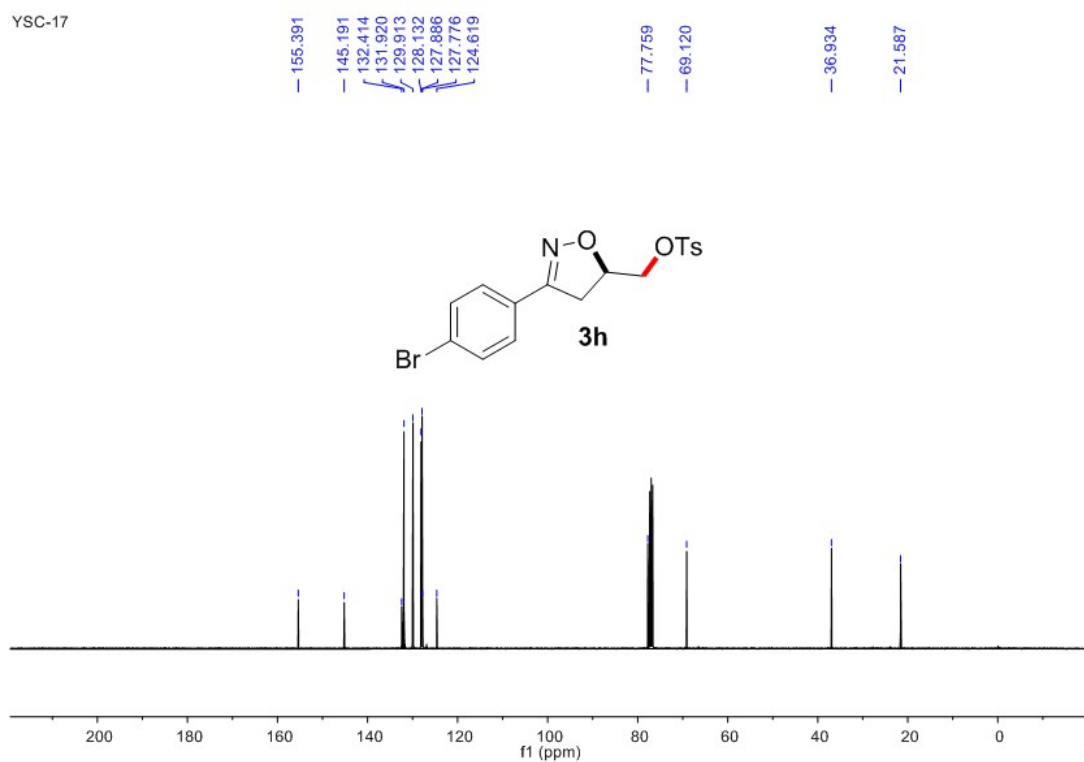

YSC-H

7.778  
7.765  
7.733  
7.719  
7.691  
7.677  
7.353  
7.340

5.028  
5.001  
4.982

4.210  
4.130  
3.471  
3.452  
3.442  
3.424  
3.290  
3.279  
3.262  
3.250  
2.447

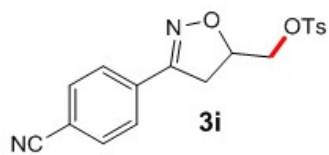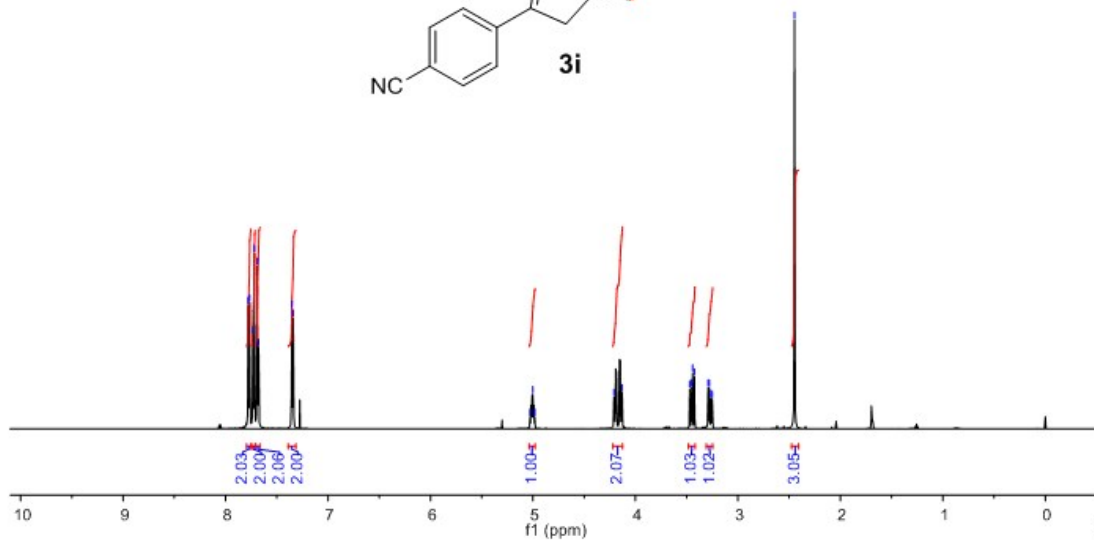

YSC-C

155.005  
145.293  
133.076  
132.418  
132.239  
129.934  
127.866  
127.140  
118.141  
113.579

78.359  
69.005

36.382  
21.590

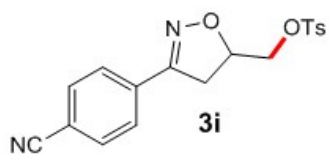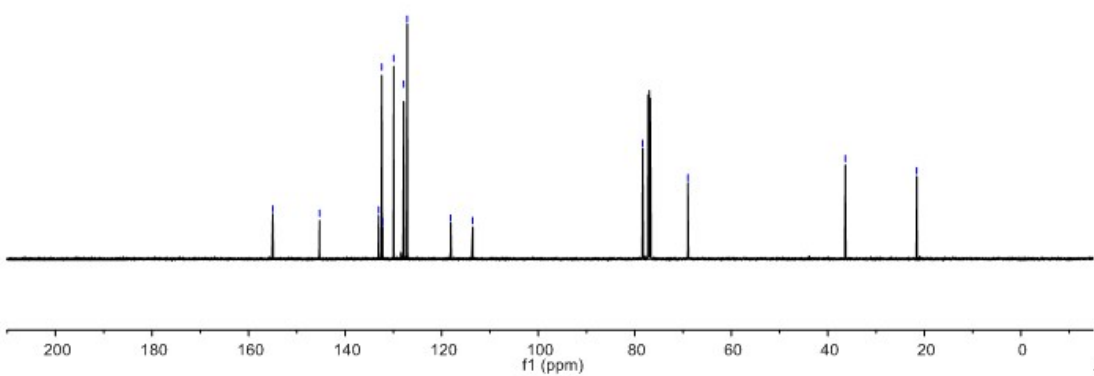

YSC-H

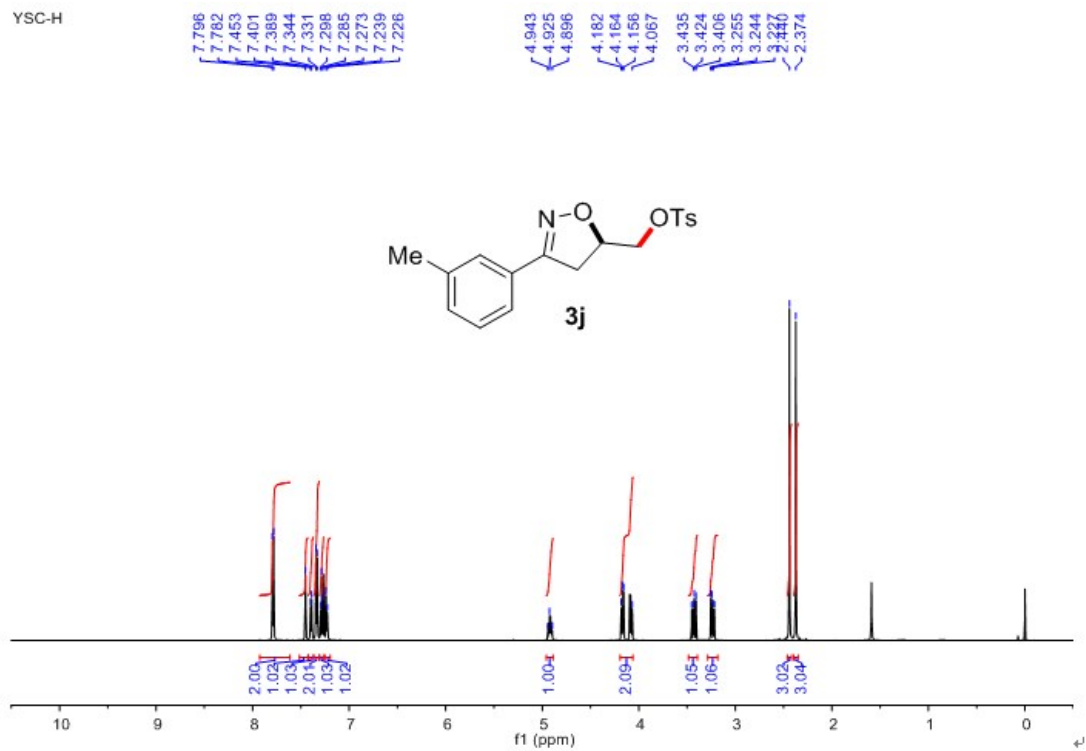

YSC-C

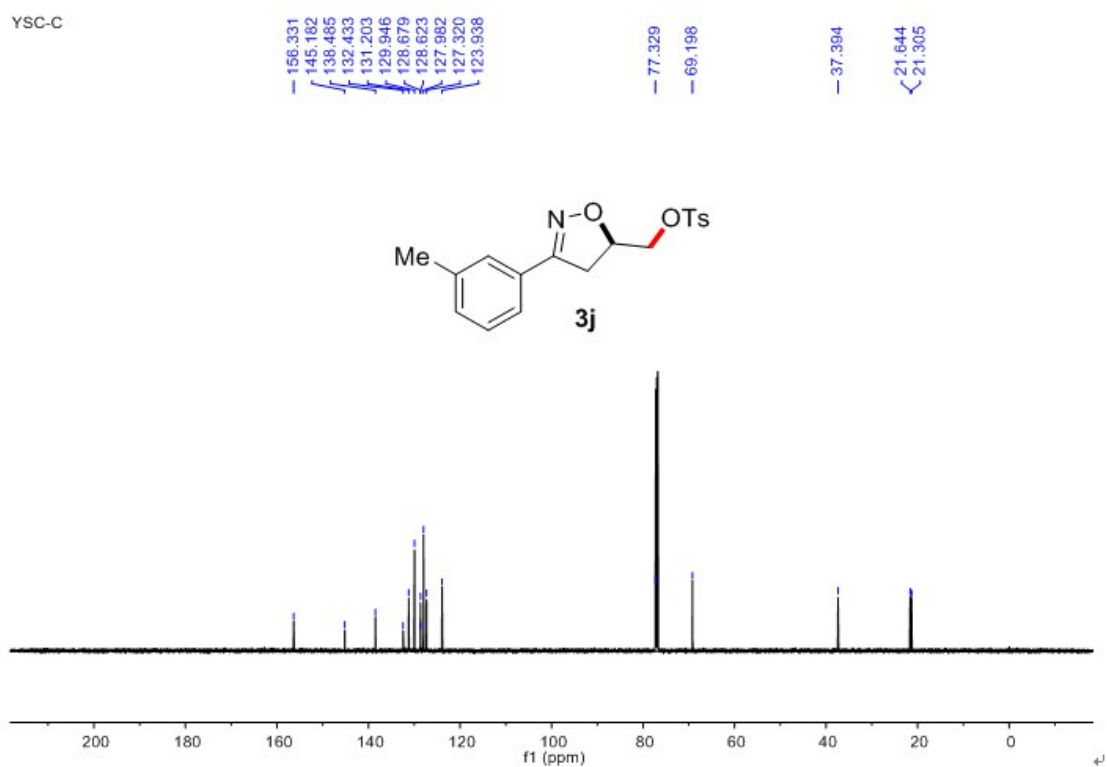



YSC-H

7.791  
7.778  
7.342  
7.328  
7.316  
7.302  
7.289  
7.209  
7.206  
7.202  
7.133  
7.120  
6.975  
5.878  
4.930  
4.921  
4.902  
4.185  
4.159  
4.101  
4.074  
3.824  
3.444  
3.426  
3.416  
3.398  
3.232  
2.837

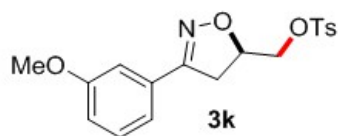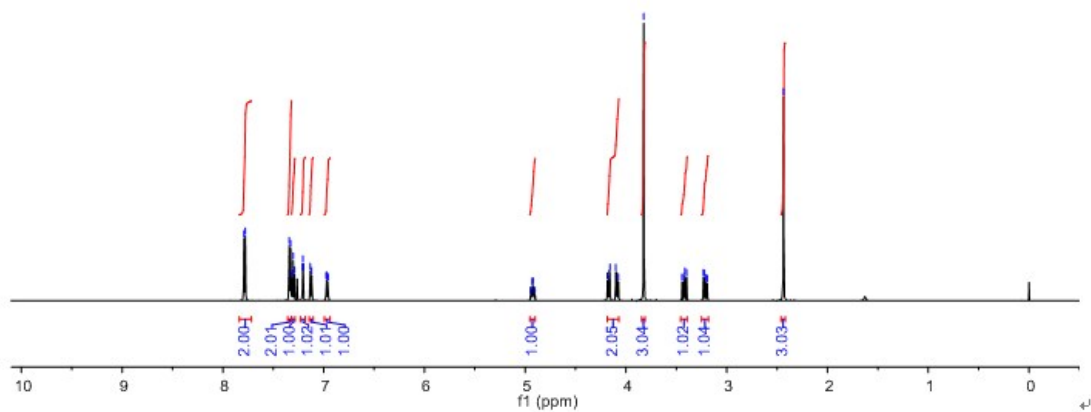

YSC-C

159.668  
158.187  
145.189  
132.397  
130.027  
129.938  
129.731  
127.946  
119.385  
118.678  
111.353  
77.481  
69.163  
55.325  
37.313  
21.615

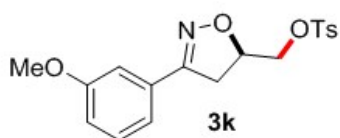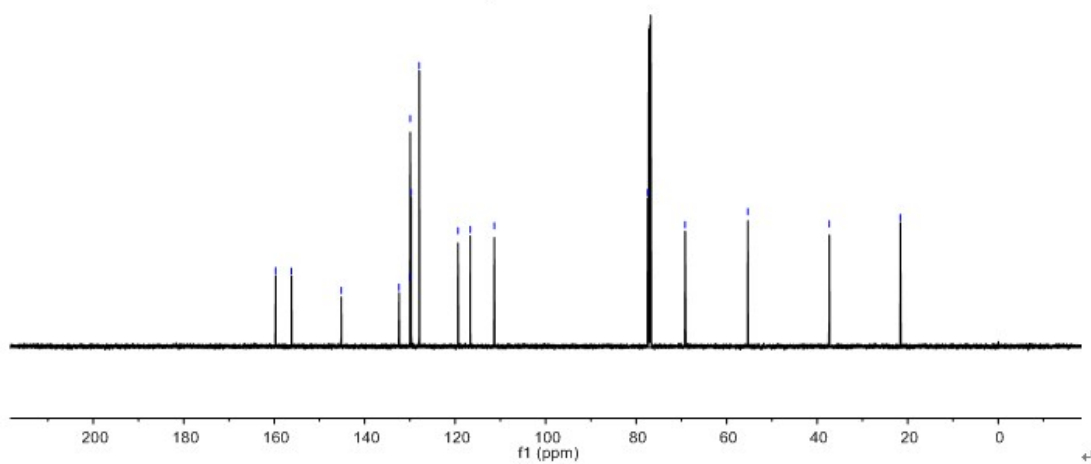

YSC-H

7.788  
7.774  
7.391  
7.346  
7.323  
7.145  
7.142  
7.113  
7.091  
4.973  
4.954  
4.927  
4.185  
4.099  
3.418  
3.408  
3.390  
3.232  
3.221  
3.204  
3.183

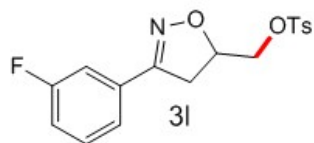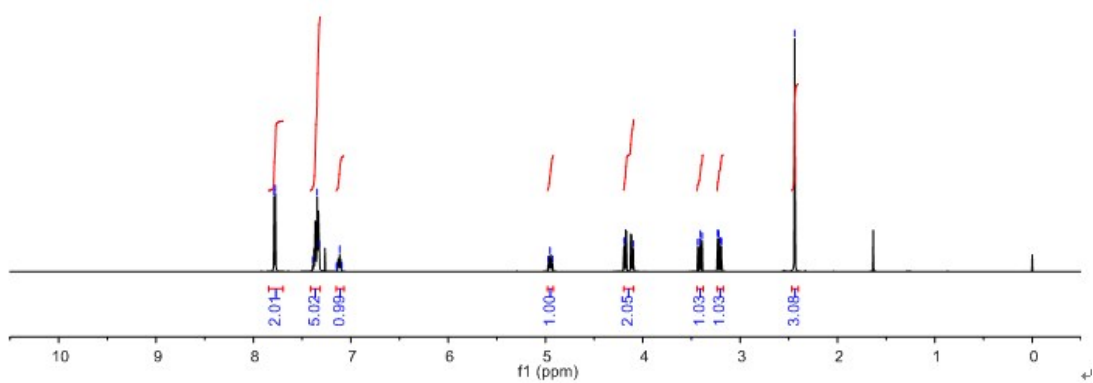

YSC-C

163.492  
161.857  
155.372  
155.353  
145.246  
132.376  
130.936  
130.881  
130.881  
130.395  
130.339  
129.943  
127.932  
122.529  
122.509  
117.380  
117.237  
113.594  
113.438  
77.787  
69.100  
36.990  
21.604

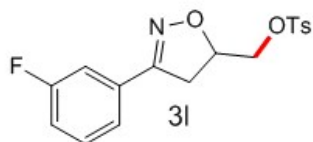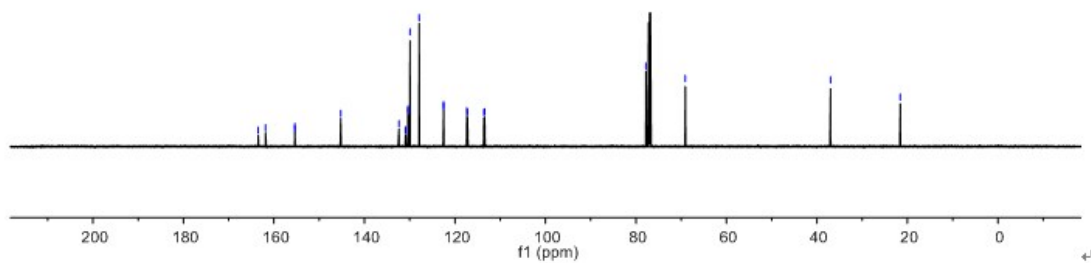

ysc-f

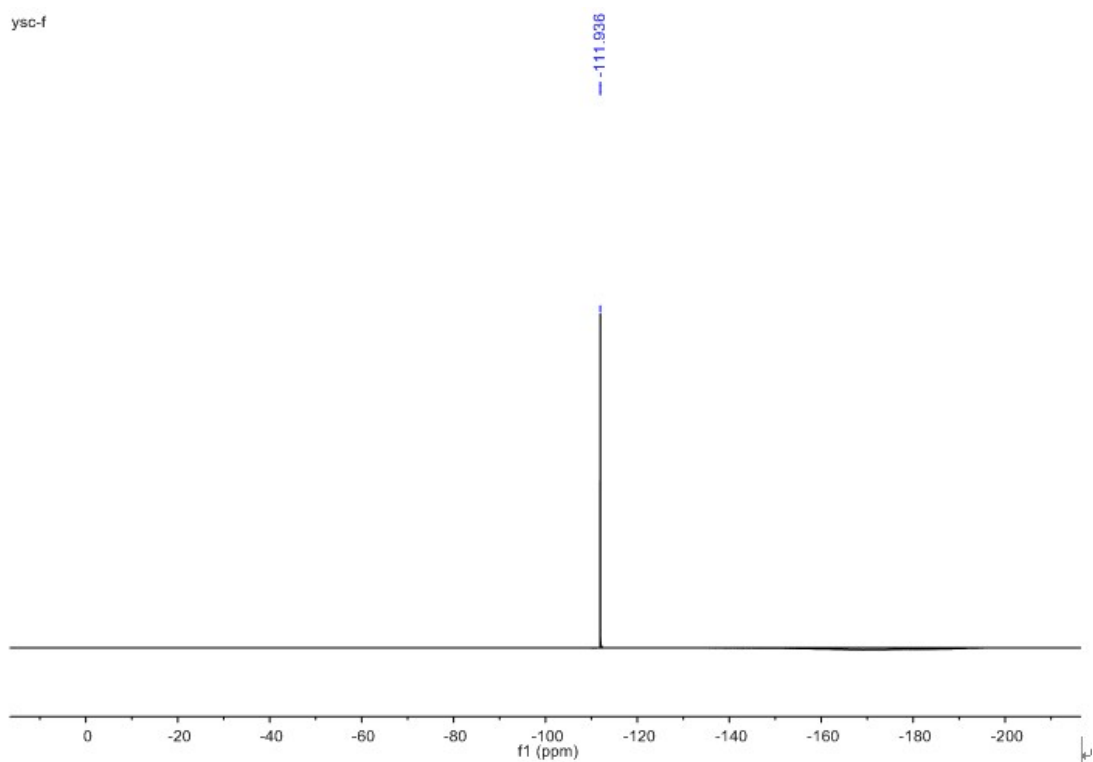

YSC-52

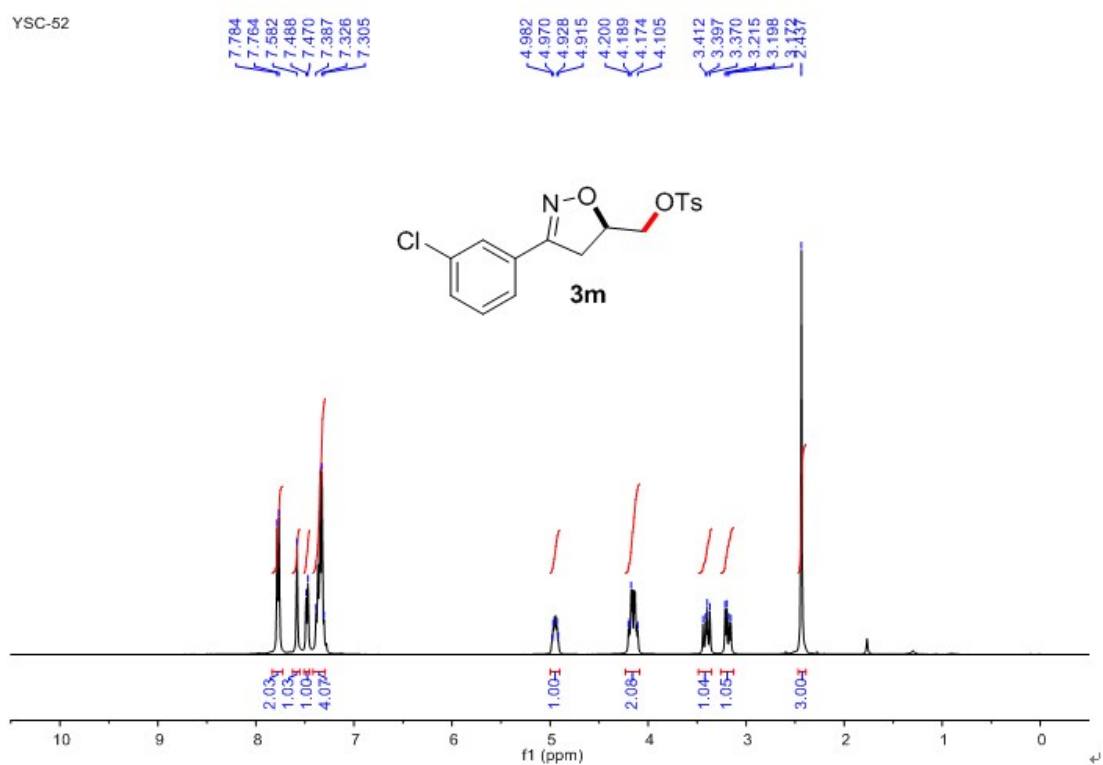

YSC-52

155.133  
145.178  
134.581  
132.250  
130.508  
130.161  
129.930  
129.871  
127.806  
126.552  
124.743  
77.760  
69.153  
36.714  
21.523

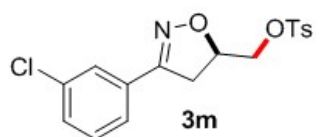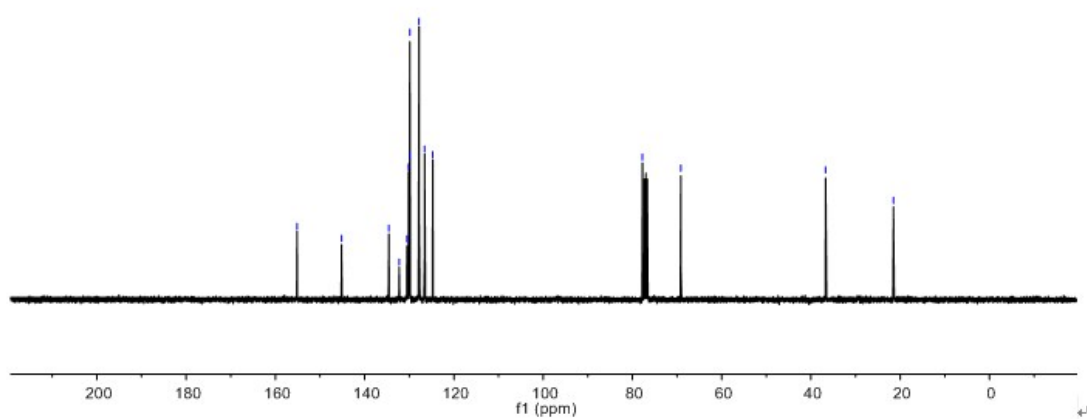

YSC-H

7.780  
7.766  
7.739  
7.538  
7.524  
7.343  
7.329  
7.277  
7.265  
7.251  
4.966  
4.958  
4.921  
4.188  
4.181  
4.098  
3.418  
3.372  
3.209  
3.173  
3.170  
2.438

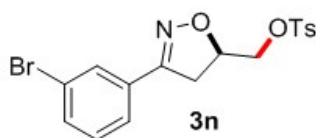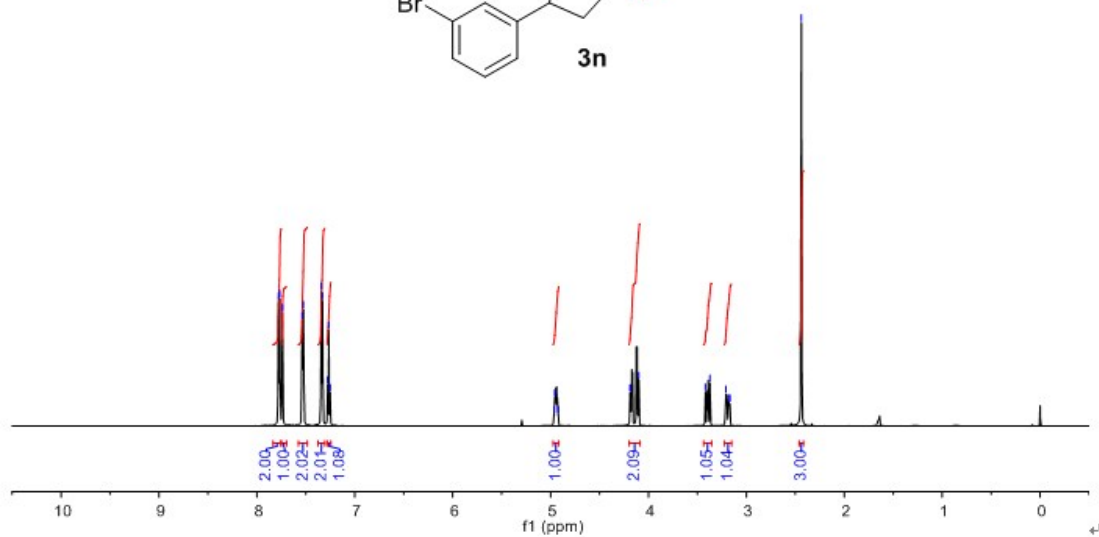

YSC-C

155.061  
145.237  
133.186  
132.325  
130.799  
130.229  
129.932  
129.562  
127.902  
125.229  
122.759  
77.794  
69.095  
36.820  
21.622

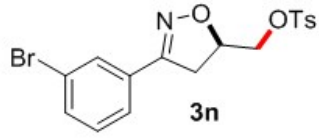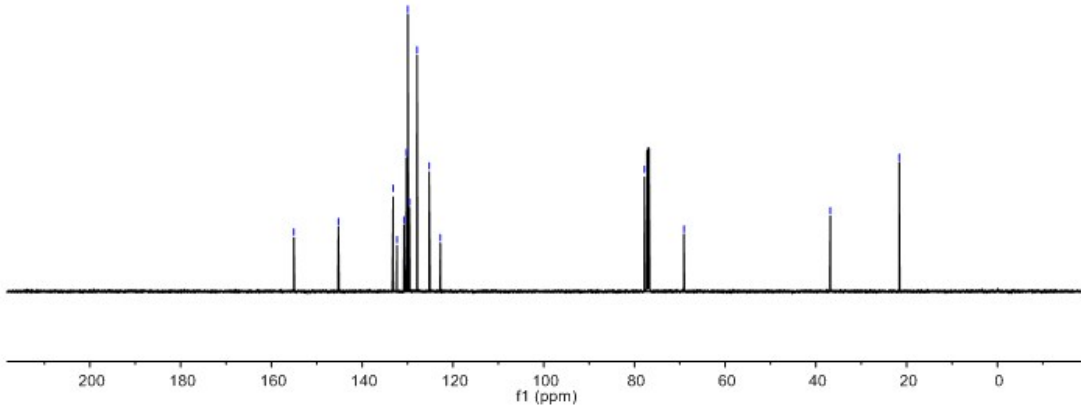

YSC-H

7.791  
7.777  
7.647  
7.632  
7.384  
7.355  
7.330  
7.316  
6.956  
6.927  
6.912  
4.876  
4.857  
4.830  
4.140  
4.123  
4.063  
3.827  
3.564  
3.546  
3.535  
3.337  
3.326  
3.307  
2.421

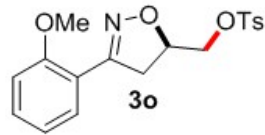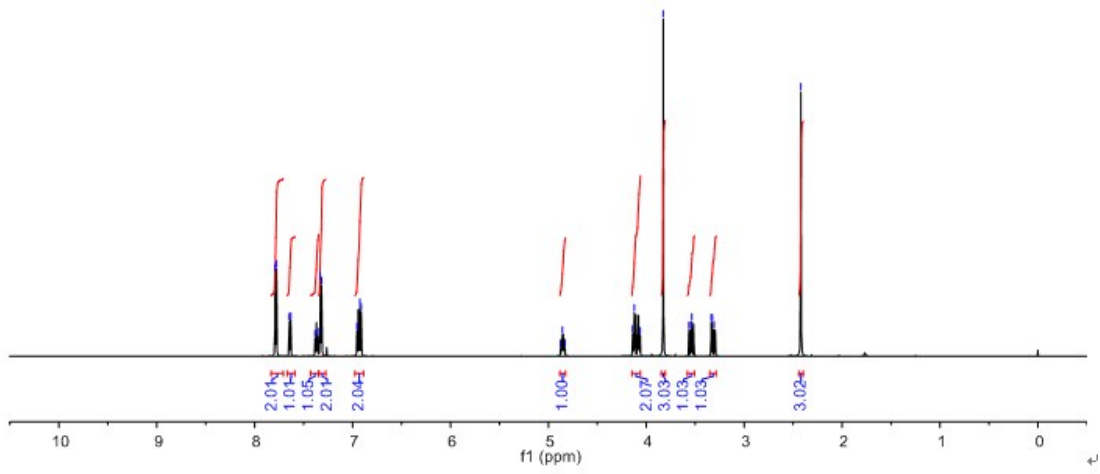

YSC-C

157.433  
155.740  
144.992  
132.437  
131.484  
129.812  
129.253  
127.836  
120.653  
117.879  
111.312  
77.235  
69.492  
55.364  
39.785  
21.513

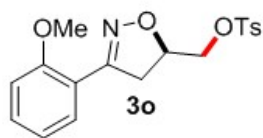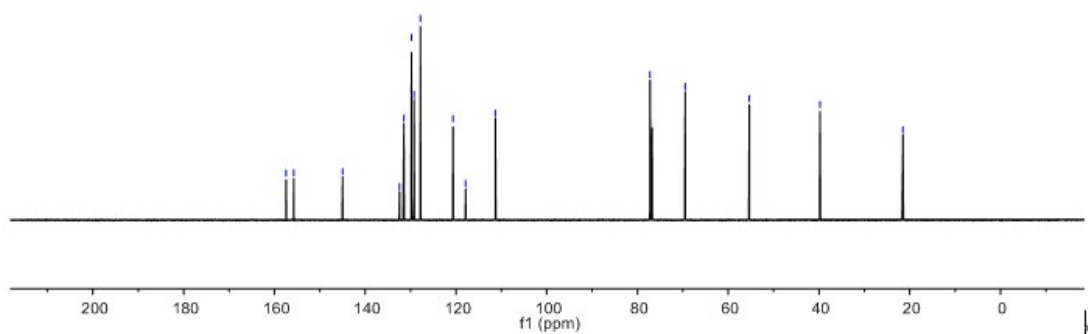

ysc-20

7.785  
7.765  
7.672  
7.465  
7.463  
7.353  
7.333  
4.996  
4.986  
4.942  
4.930  
4.205  
4.167  
4.099  
3.404  
3.390  
3.362  
3.233  
3.216  
3.191  
2.416

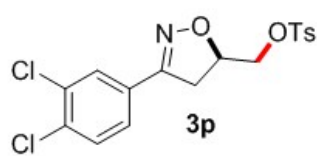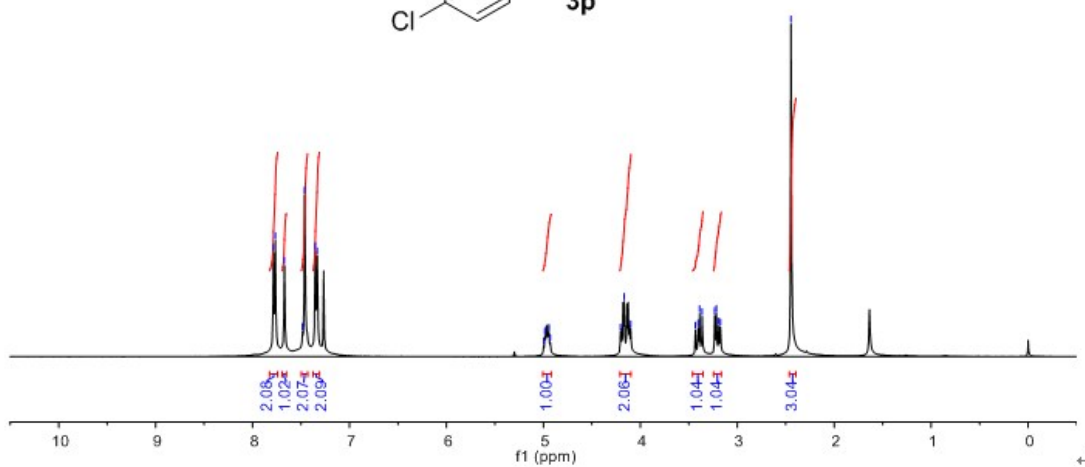

YSC-20

154.466  
145.288  
134.452  
133.116  
132.407  
130.769  
129.950  
128.840  
128.448  
127.927  
125.757  
78.069  
69.036  
36.750  
21.625

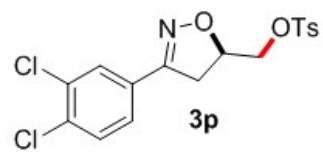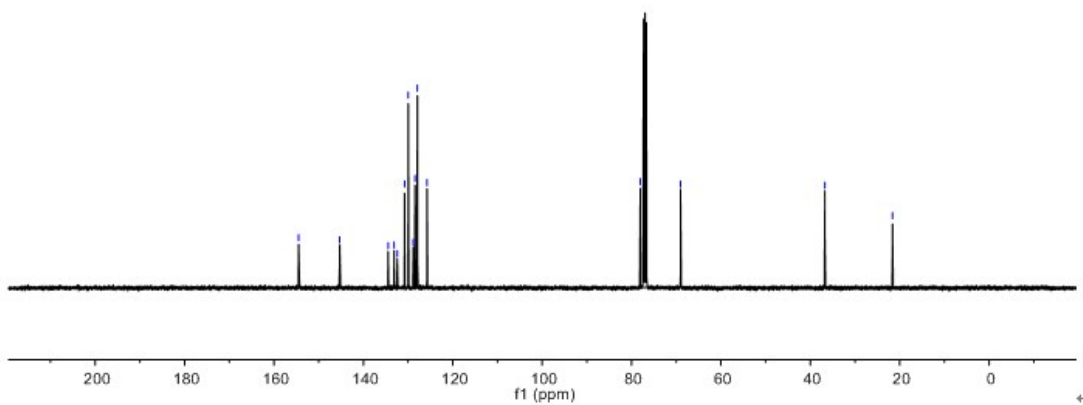

ysc-21

7.797  
7.776  
7.413  
7.346  
7.326  
7.307  
7.159  
7.140  
4.934  
4.906  
4.864  
4.177  
4.165  
4.151  
4.139  
3.424  
3.409  
3.382  
3.243  
3.227  
2.491  
2.283  
2.276

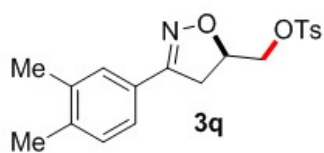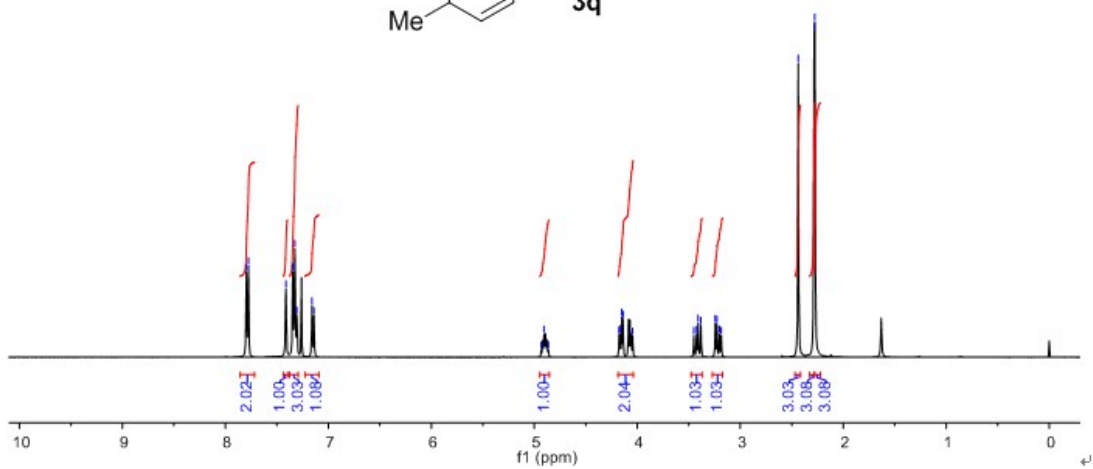

YSC-21

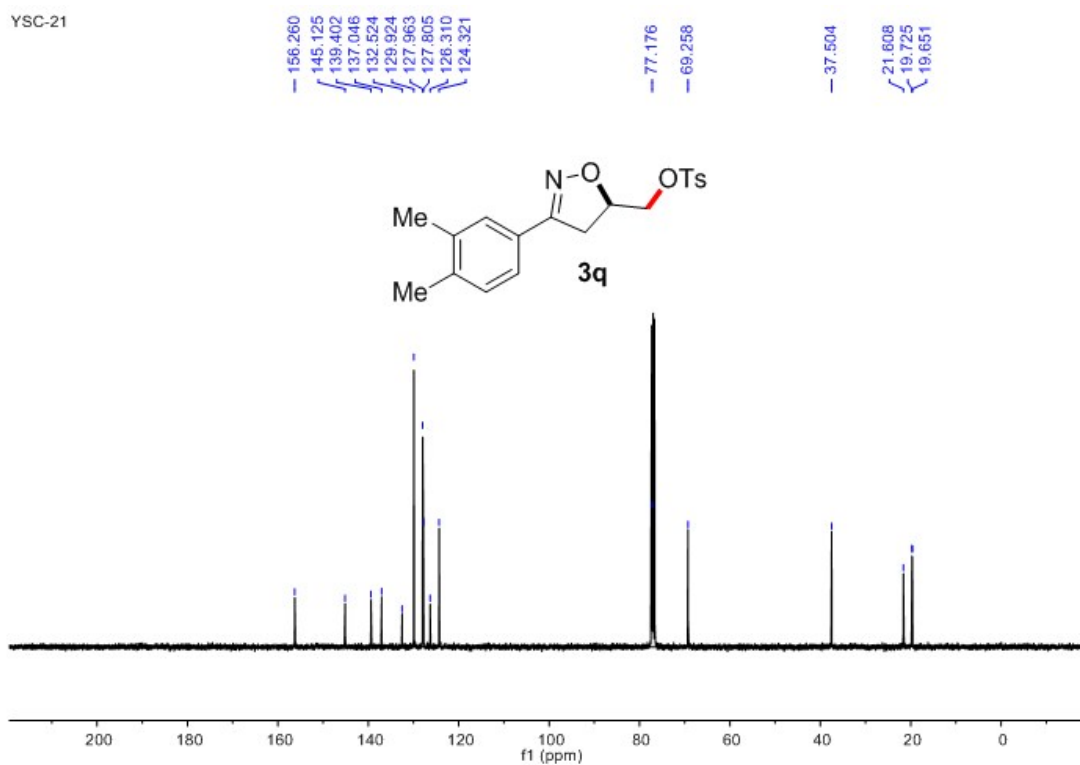

ysc-24

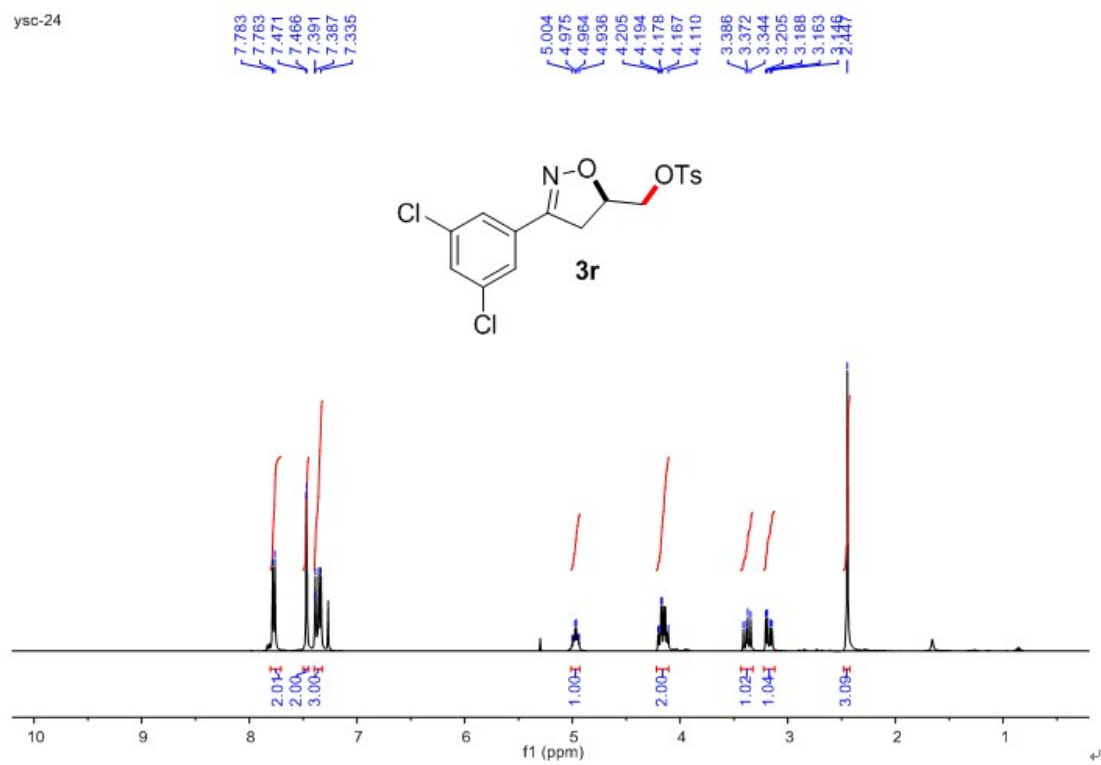



YSC-24

154.295  
145.282  
135.431  
132.386  
131.720  
130.017  
129.939  
127.901  
124.974  
78.194  
69.018  
36.532  
21.603

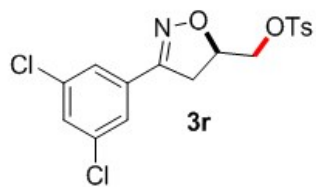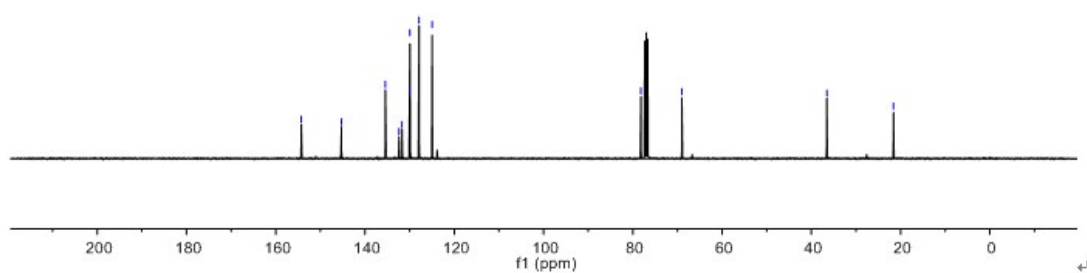

YSC-51

7.793  
7.773  
7.347  
7.327  
6.748  
6.744  
6.503  
4.953  
4.912  
4.884  
4.186  
4.174  
4.076  
4.063  
3.403  
3.388  
3.360  
3.199  
3.183  
2.156

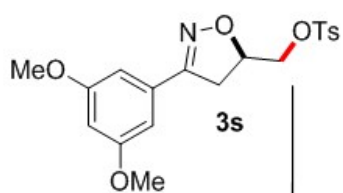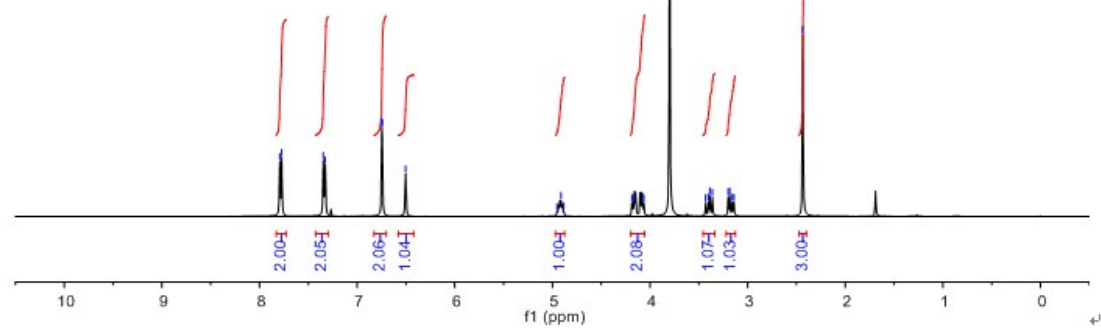

YSC-51

160.786  
156.233  
145.179  
132.360  
130.481  
129.919  
127.910  
104.734  
102.541  
77.522  
69.150  
55.426  
37.248  
21.574

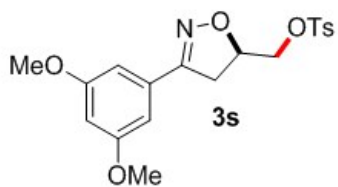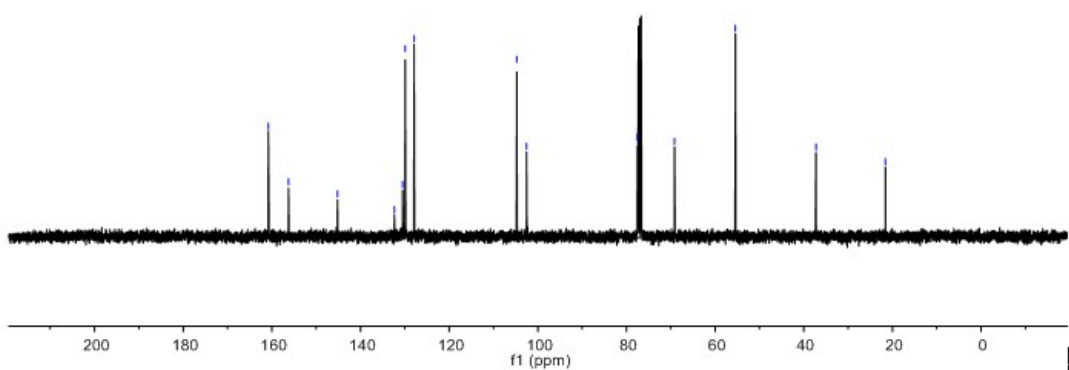

ysc-44

7.897  
7.893  
7.771  
7.544  
7.493  
7.309  
7.289  
5.002  
4.973  
4.933  
4.227  
4.201  
4.189  
4.107  
3.535  
3.520  
3.493  
3.368  
3.351  
3.326  
2.389

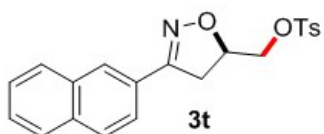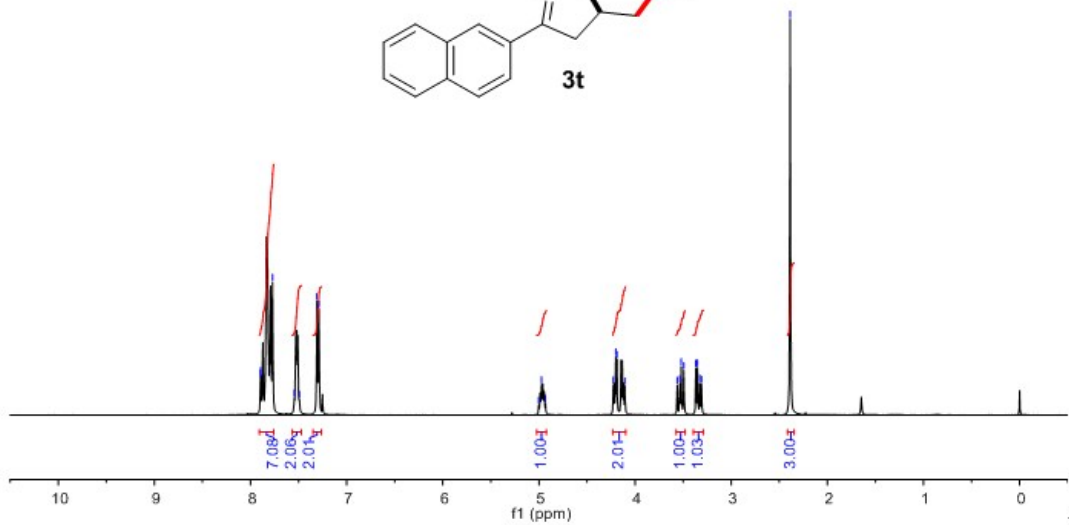

ysc-44

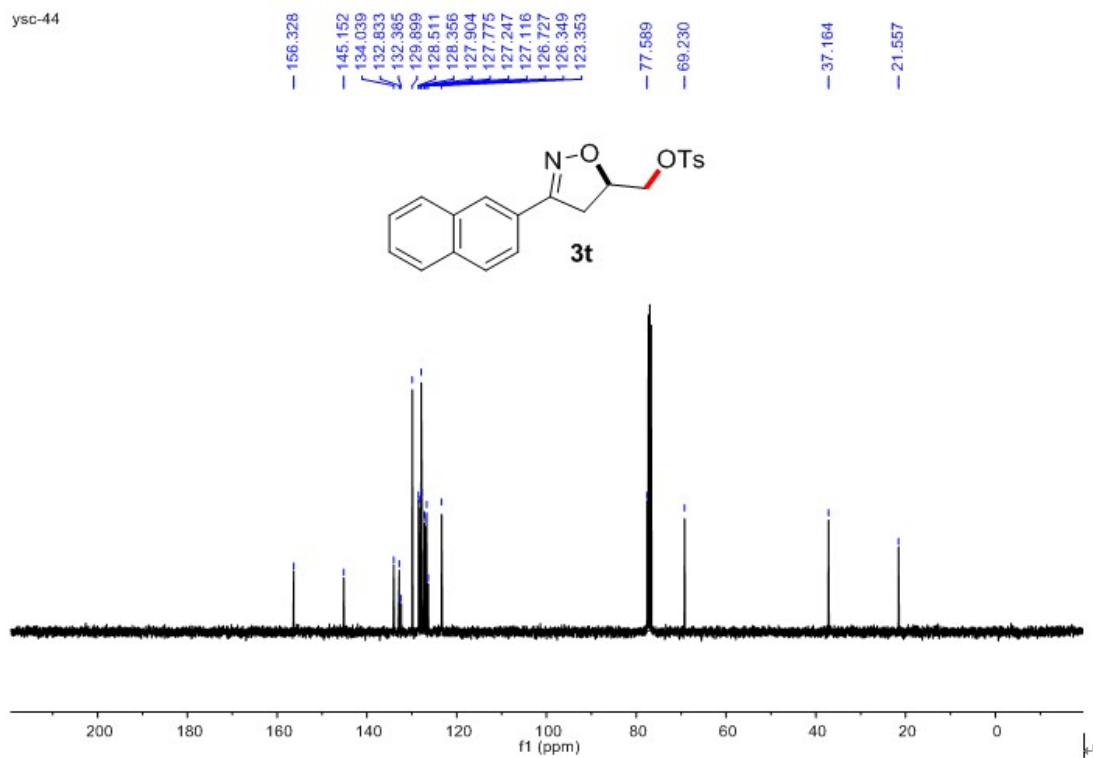

YSC-H

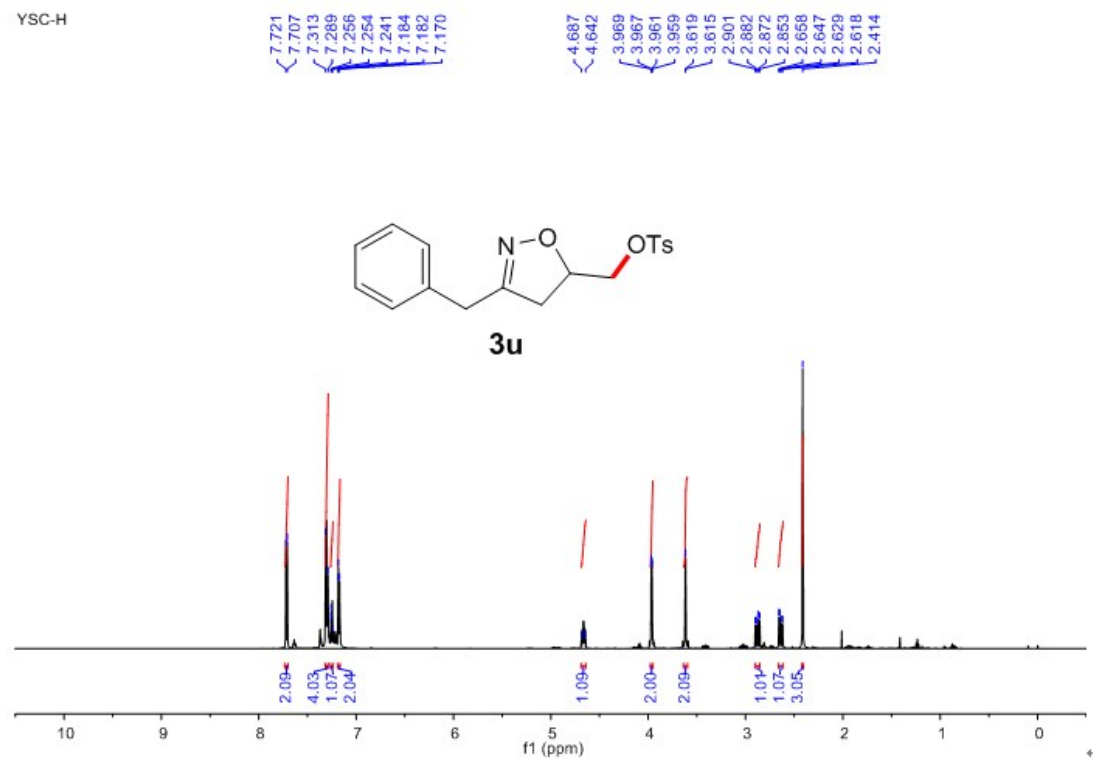

YSC-C

157.295  
144.925  
135.075  
132.155  
129.722  
128.650  
128.513  
127.882  
126.937

76.480  
69.427

38.252  
33.498

21.392

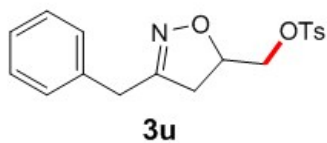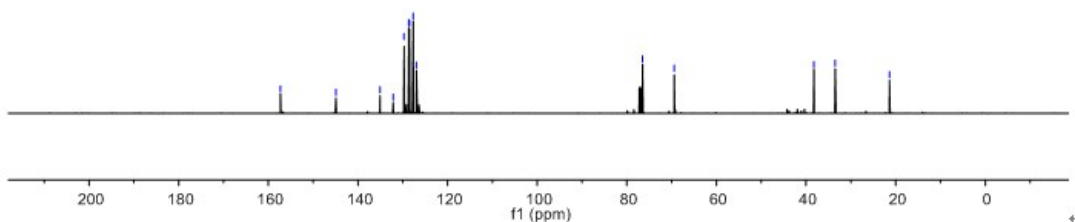

YSC-H

7.792  
7.779  
7.362  
7.349

4.711  
4.685

4.058  
3.940  
3.027  
3.016  
2.999  
2.840  
2.830  
2.811  
2.802  
2.451  
2.372

1.824  
1.763  
1.687  
1.676  
1.332  
1.297  
1.189

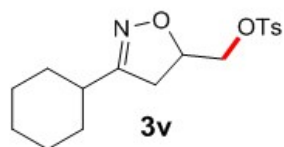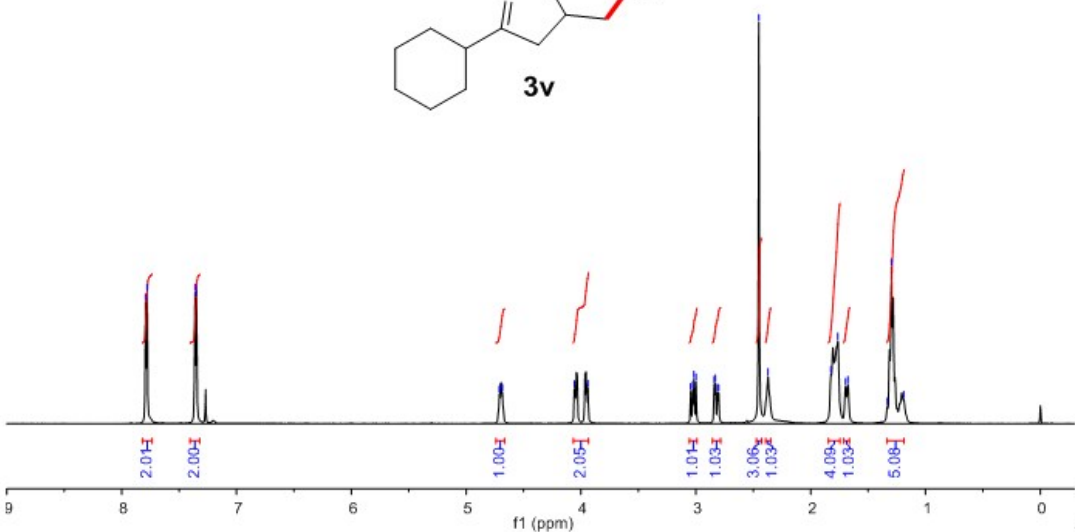

YSC-C

162.361  
145.119  
132.461  
129.901  
127.957  
75.752  
69.426  
37.652  
37.029  
30.267  
30.210  
25.738  
25.614  
21.614

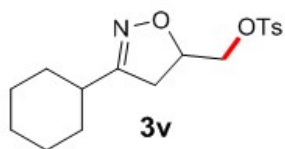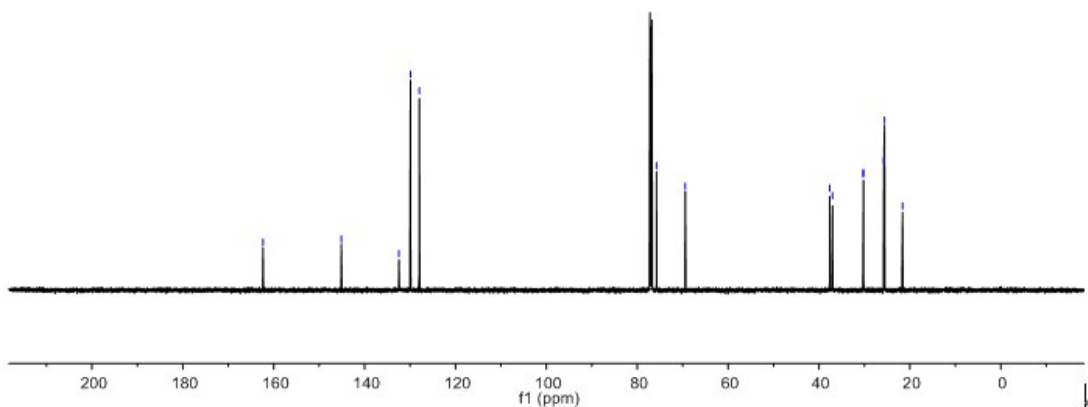

YSC-H

7.783  
7.780  
7.772  
7.769  
7.598  
7.594  
7.581  
7.578  
7.411  
7.410  
7.376  
7.372  
7.329  
7.316  
4.016  
4.012  
3.397  
3.369  
3.067  
3.039  
2.425  
1.480

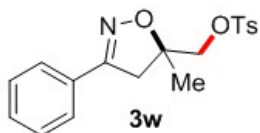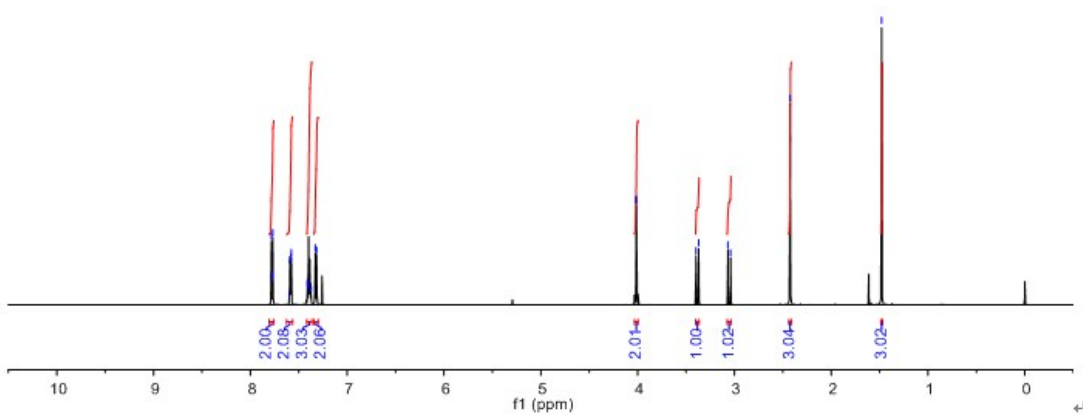

YSC-C

156.367  
145.150  
132.381  
130.222  
128.925  
128.232  
128.678  
127.954  
126.574  
84.409  
72.187  
42.973  
22.869  
21.623

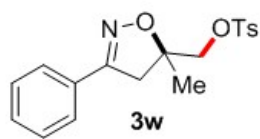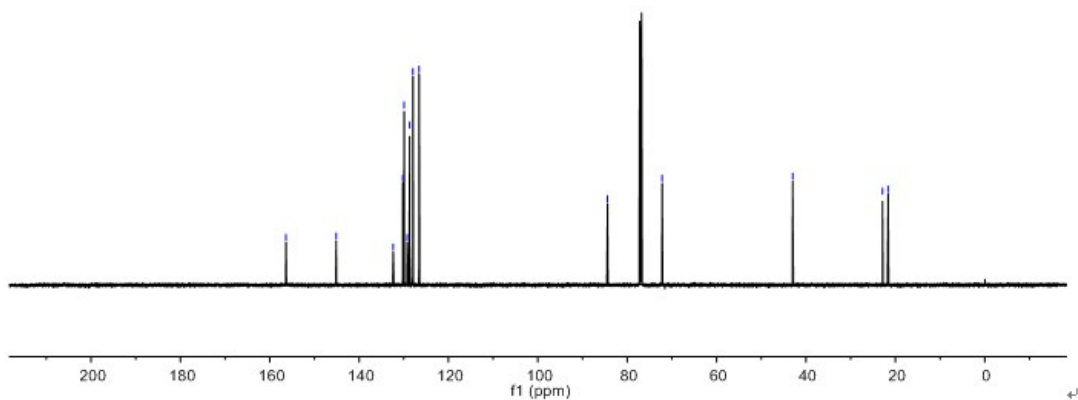

YSC-32

7.920  
7.902  
7.899  
7.879  
7.804  
7.570  
7.550  
7.531  
7.423  
7.411  
7.383  
7.380  
7.371  
4.975  
4.946  
4.906  
4.222  
4.196  
4.111  
3.484  
3.457  
3.442  
3.415  
3.275  
3.258  
3.233  
3.216

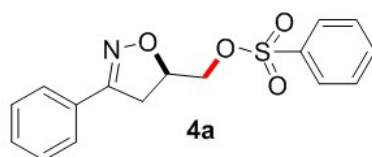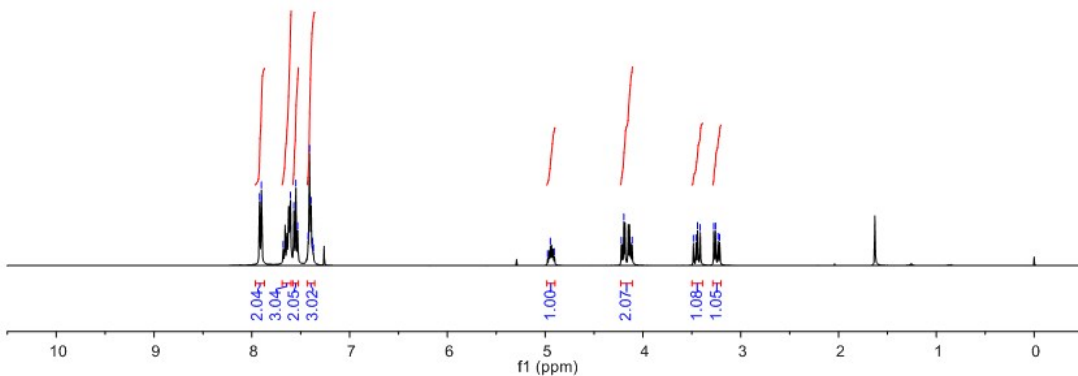

the-ysc-C

156.205  
134.061  
130.406  
129.327  
128.739  
127.907  
126.737  
77.400  
69.393  
37.239

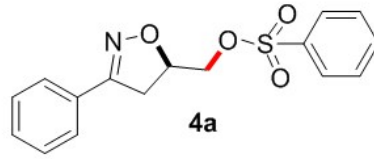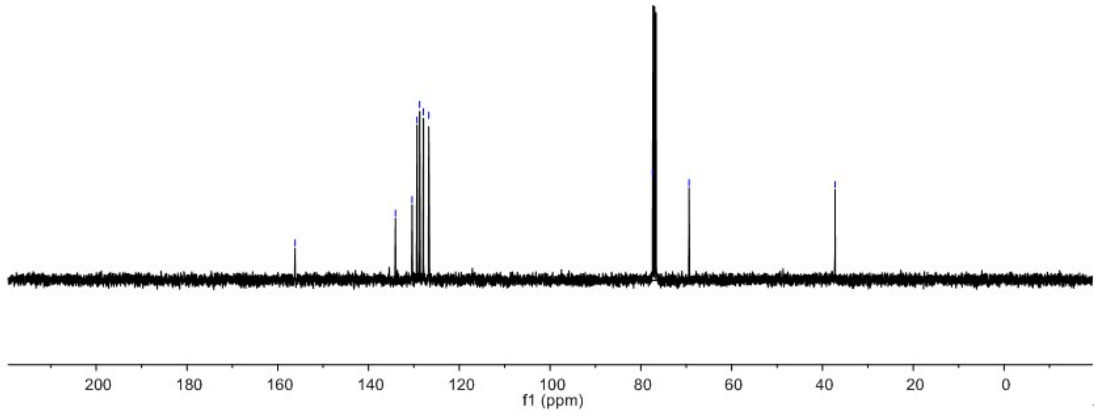

ysc-42

7.849  
7.828  
7.622  
7.618  
7.603  
7.598  
7.524  
7.502  
7.431  
7.386  
7.378  
4.978  
4.966  
4.922  
4.910  
4.197  
4.192  
4.153  
3.467  
3.452  
3.425  
3.266  
3.249  
3.223  
3.206

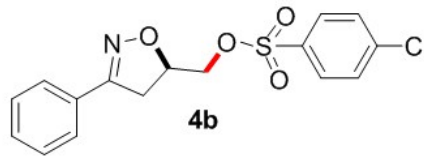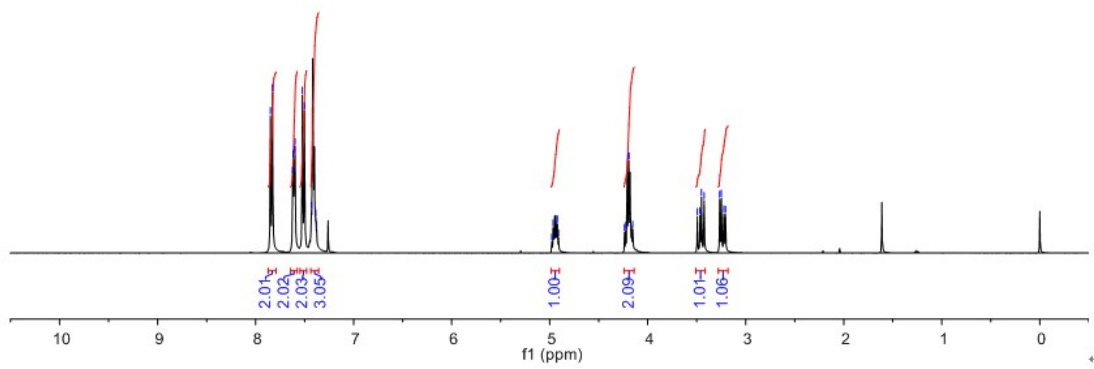

the-ysc-C

156.169  
140.799  
133.985  
130.454  
129.663  
129.343  
128.767  
126.715  
69.708  
37.103

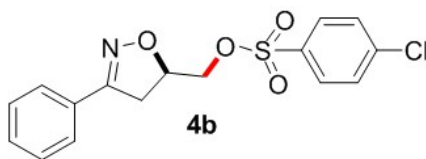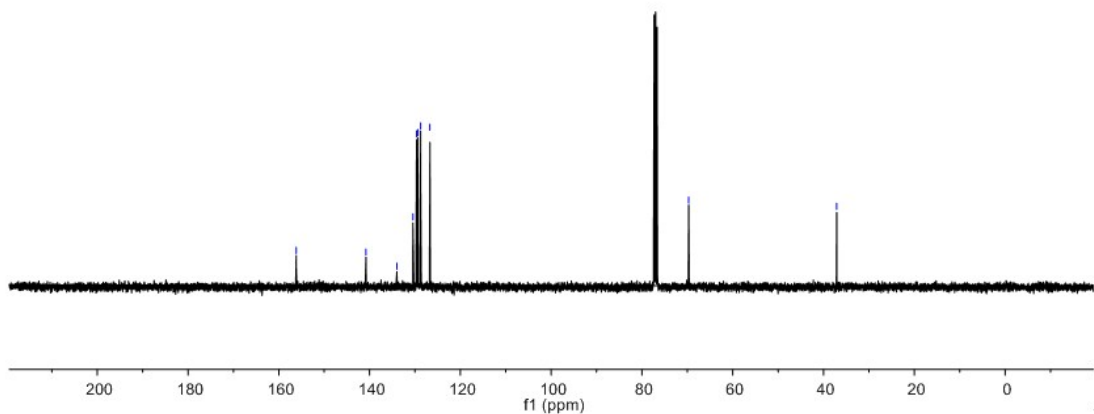

ysc-4b  
8.736  
8.733  
8.729  
8.511  
8.509  
8.485  
8.483  
8.243  
8.241  
8.220  
8.217  
7.799  
7.779  
7.759  
7.589  
7.586  
7.570  
7.565  
7.447  
7.443  
7.410  
7.376  
7.369  
4.984  
4.928  
4.917  
4.361  
4.351  
4.294  
4.283  
3.512  
3.485  
3.470  
3.443  
3.281  
3.264  
3.239  
3.222

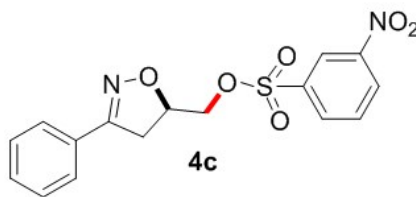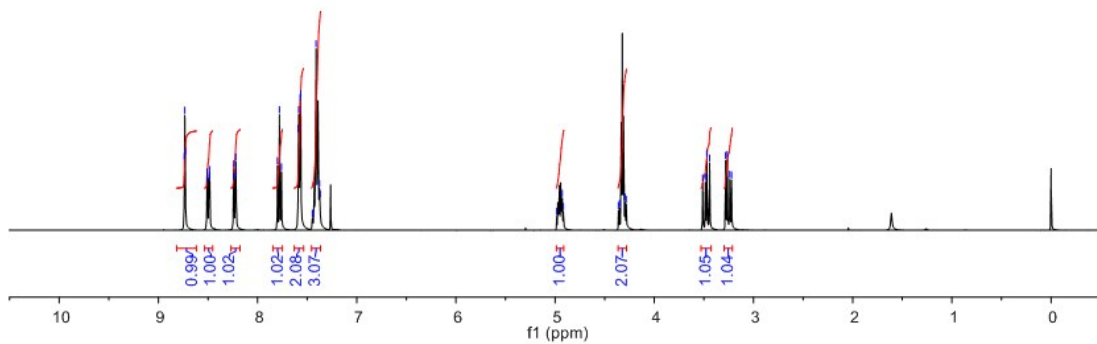



ysc-46

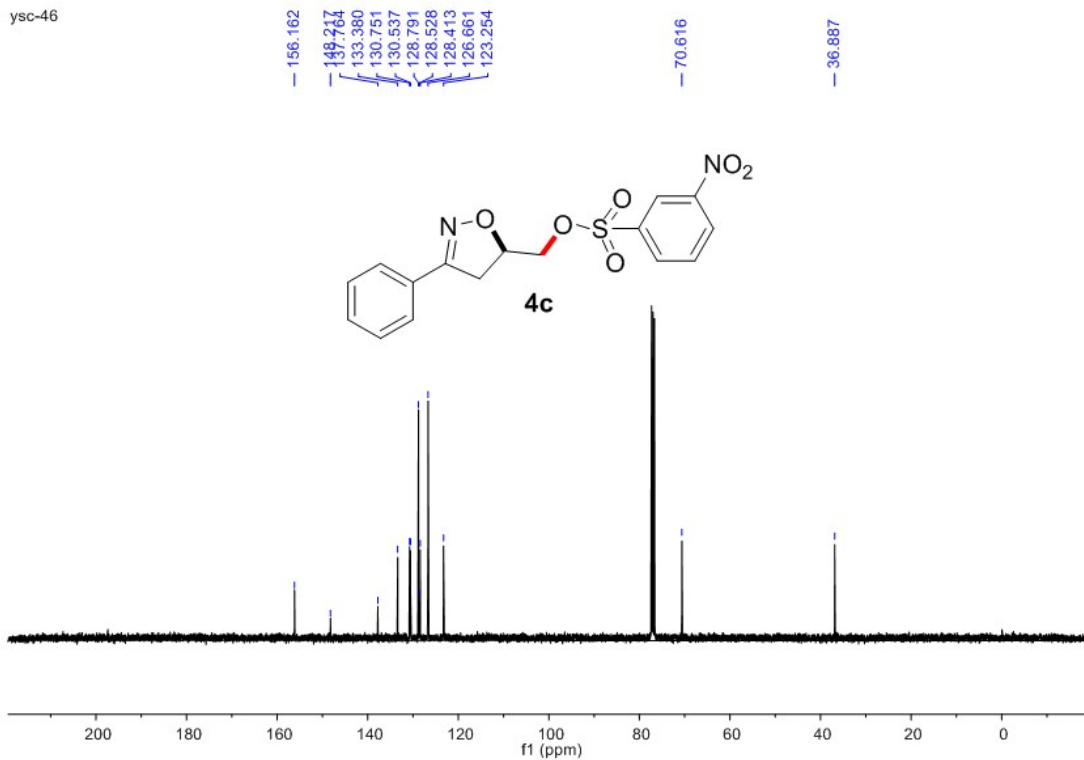

ysc-56

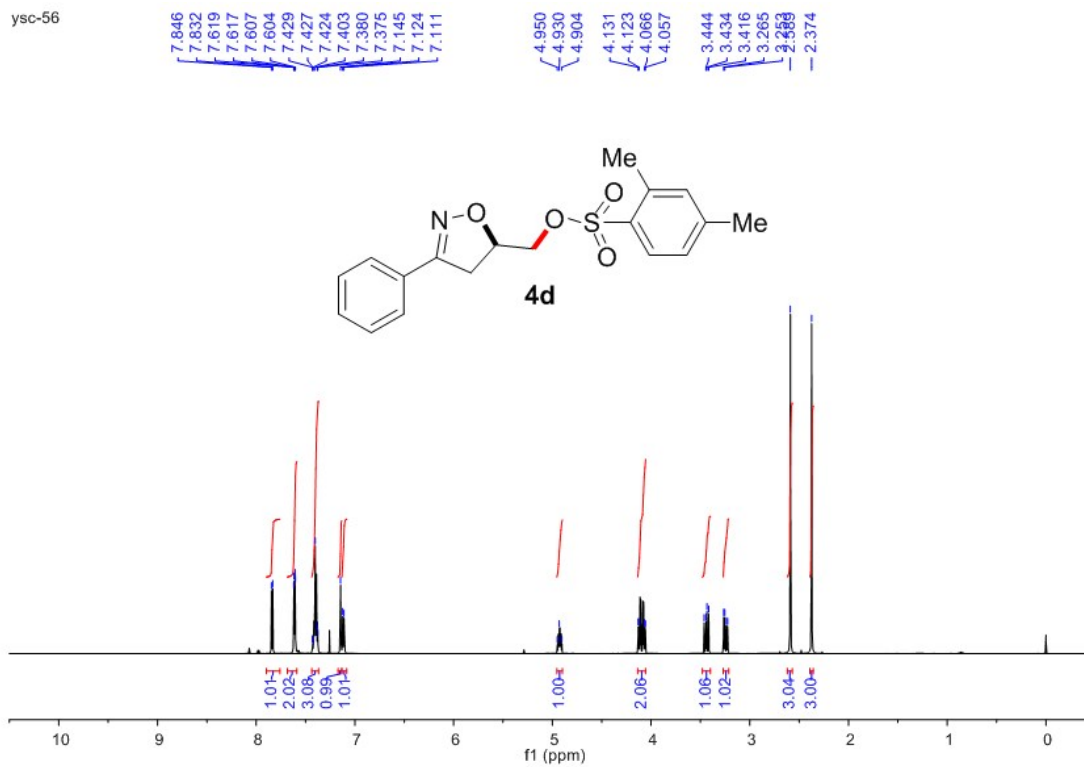

ysc-56

156.162  
144.973  
138.429  
133.431  
130.742  
130.345  
130.107  
128.782  
128.707  
126.712  
126.686  
77.471  
69.180  
37.088  
21.344  
20.073

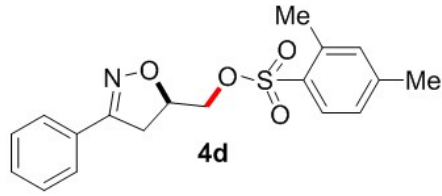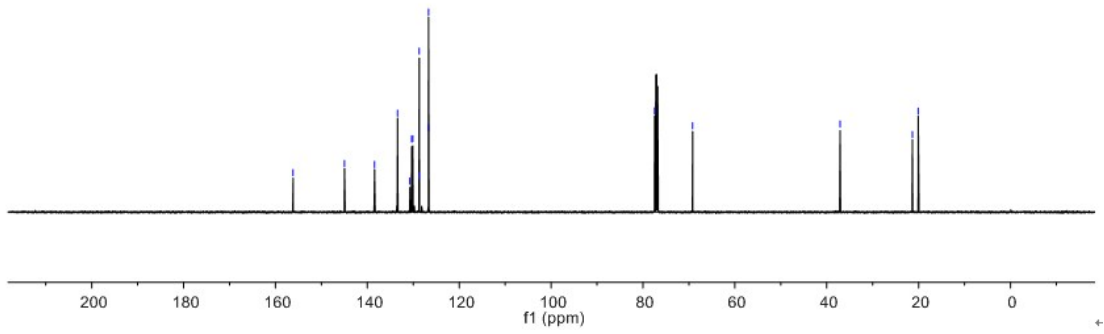

ysc-57

7.777  
7.627  
7.625  
7.614  
7.612  
7.434  
7.432  
7.386  
7.382  
7.323  
7.310  
7.235  
7.222  
4.965  
4.946  
4.919  
4.151  
4.125  
4.100  
4.074  
3.447  
3.429  
3.282  
3.271  
2.582  
2.370

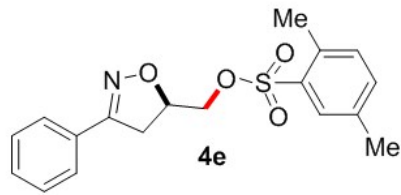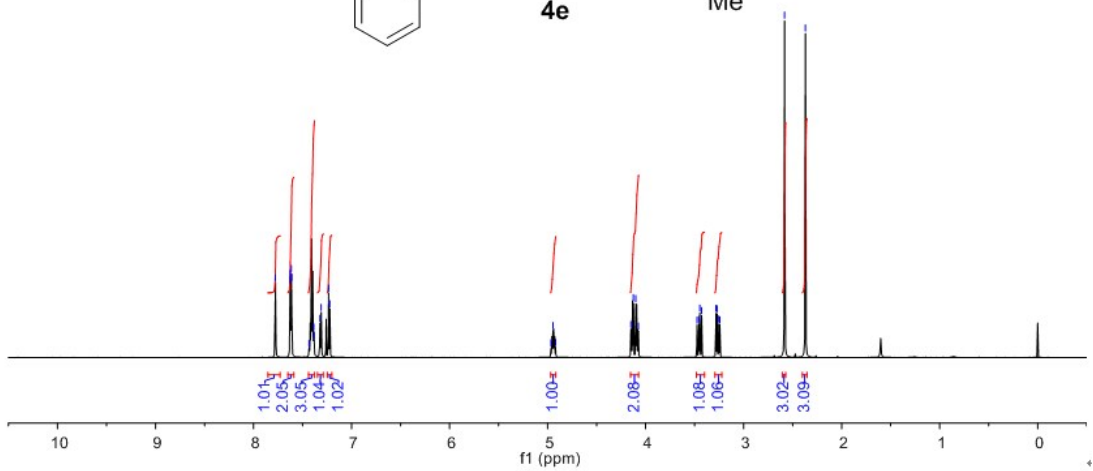

ysc-57

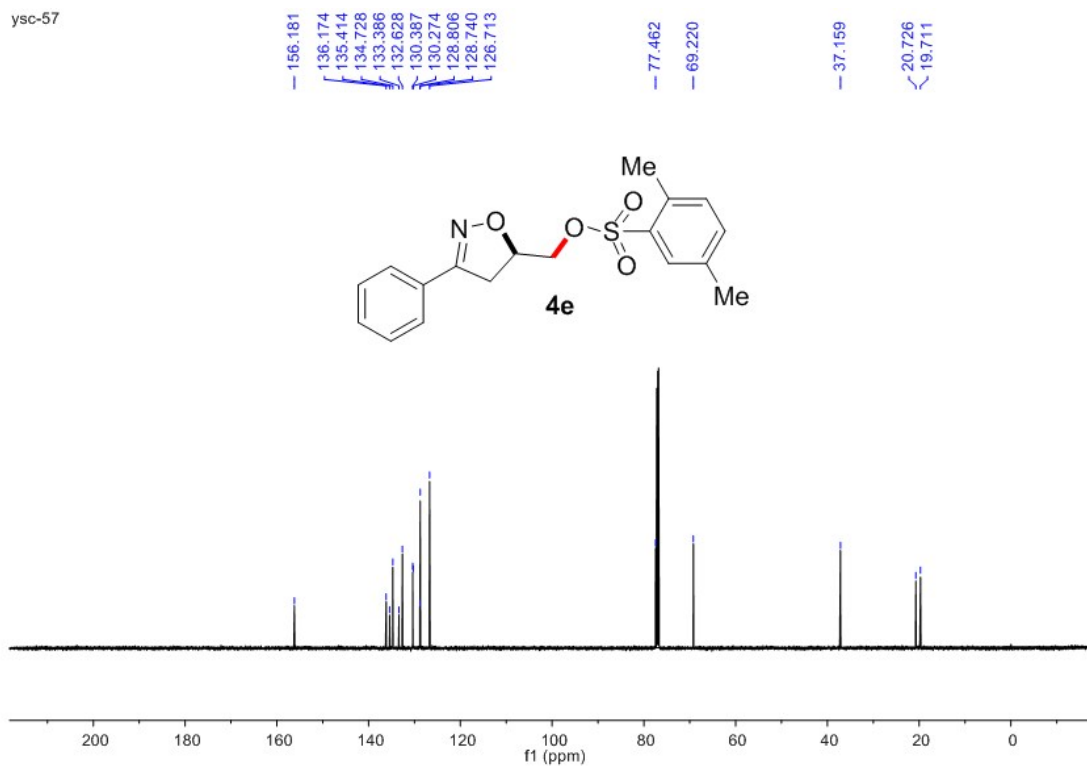

ysc-47

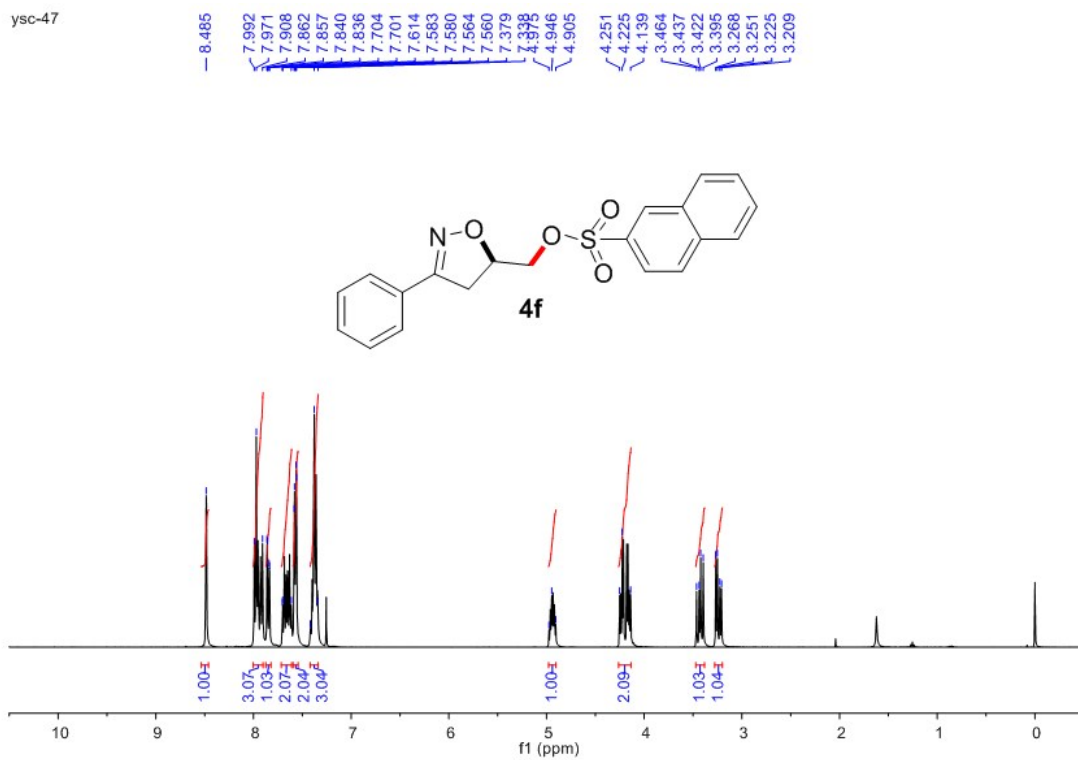

ysc-47

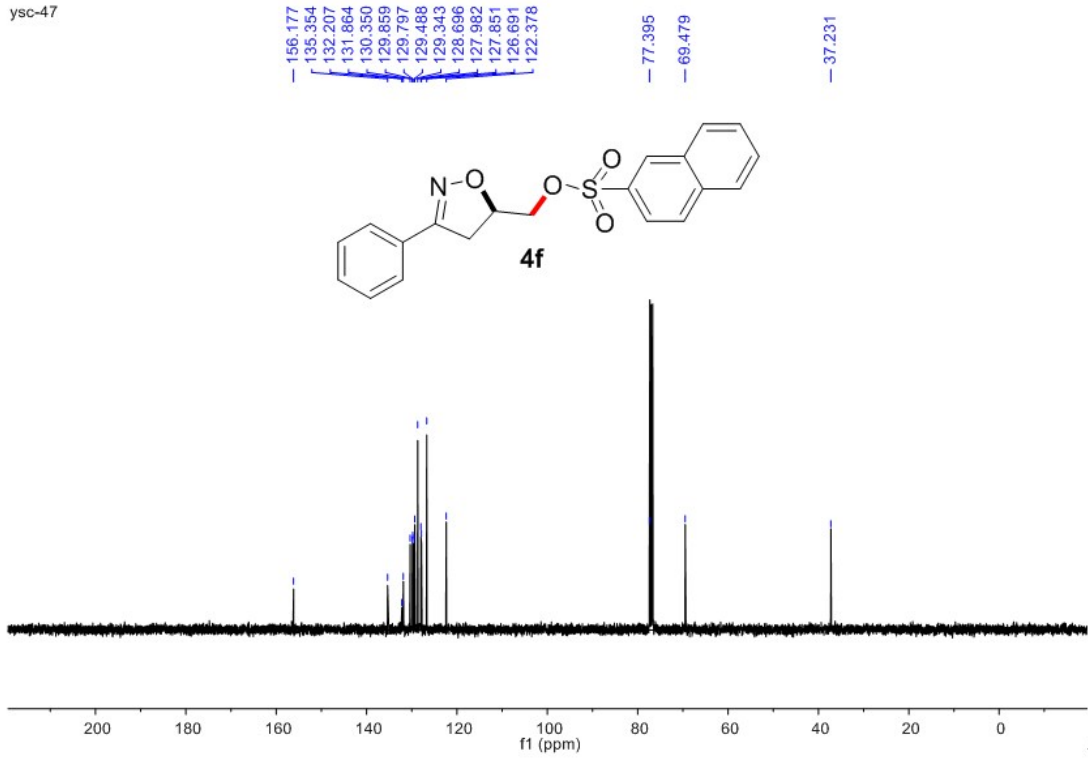

YSC-H

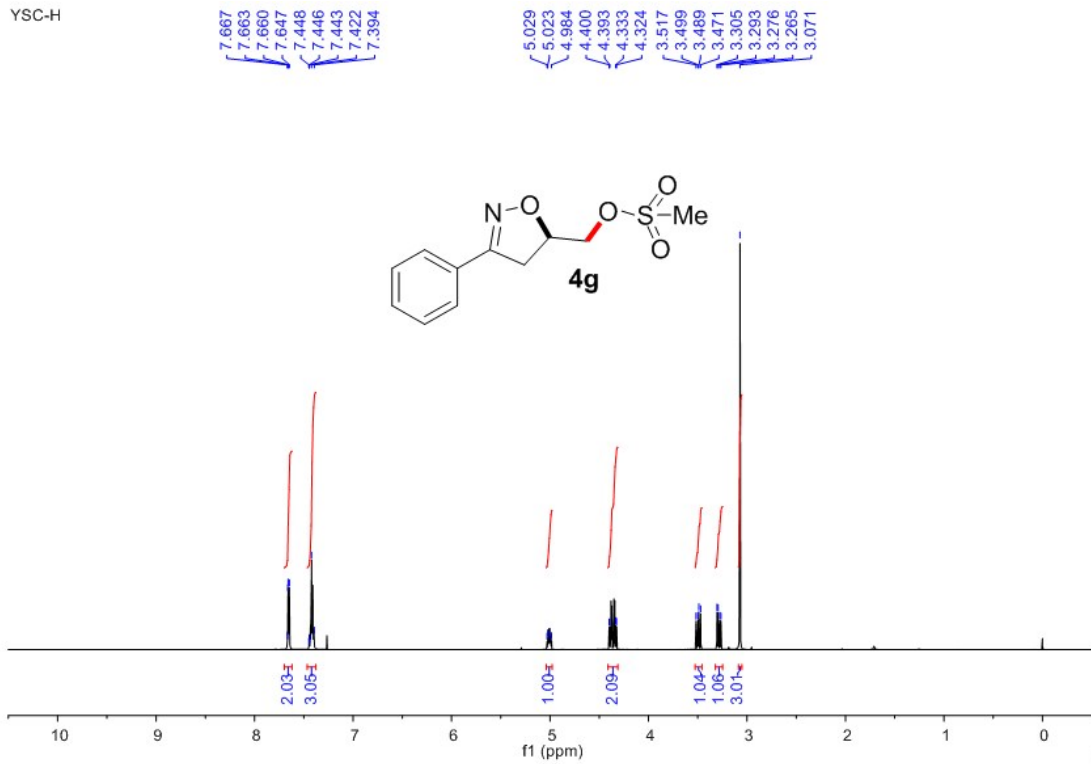

YSC-C

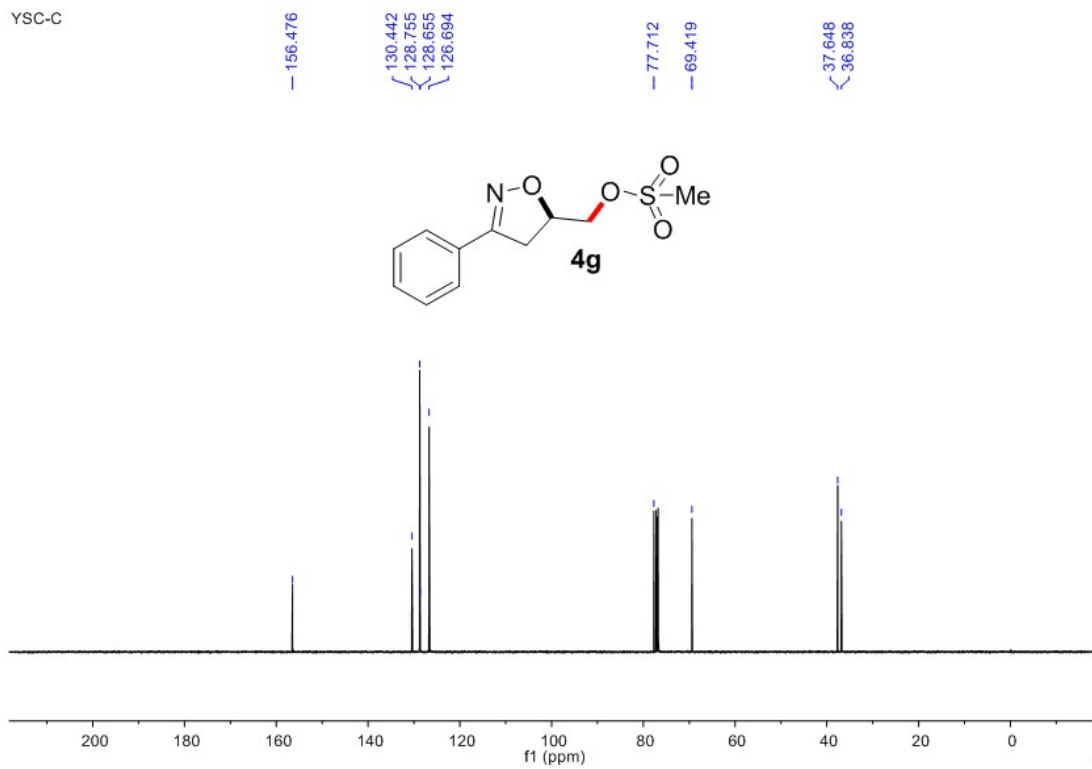

YSC-H

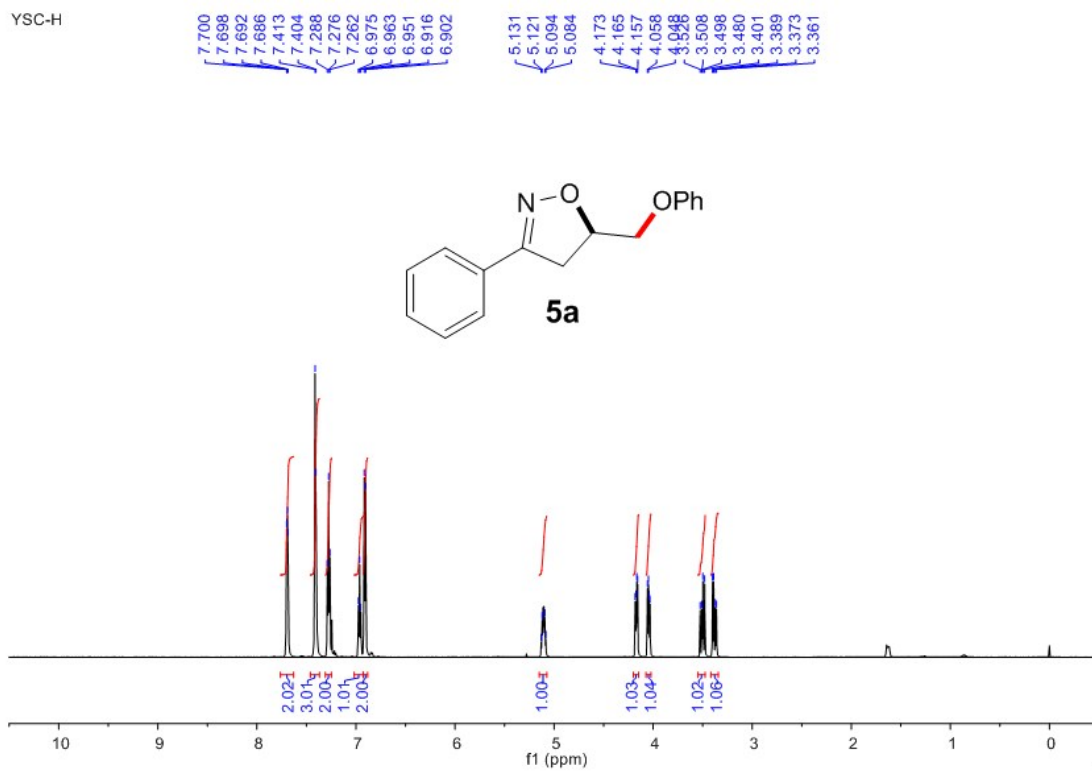

YSC-C

158.376  
156.411  
130.171  
129.488  
129.307  
128.698  
126.733  
121.281  
114.572  
78.711  
68.392  
37.612

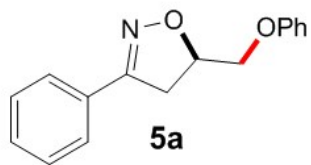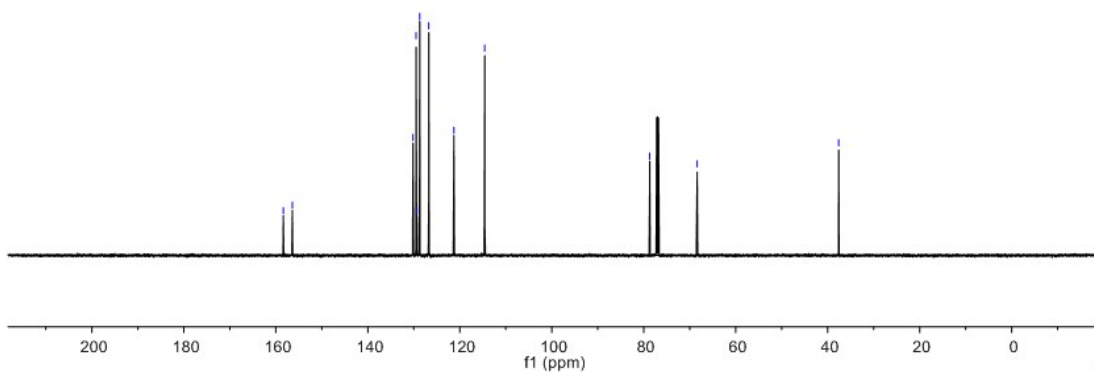

YSC-H

7.655  
7.653  
7.644  
7.640  
7.420  
7.390  
7.316  
7.303  
7.290  
7.240  
7.228  
7.215  
4.892  
4.864  
4.842  
3.452  
3.435  
3.358  
3.350  
3.279  
3.268  
3.251  
3.240  
2.998  
2.983  
2.975  
2.960

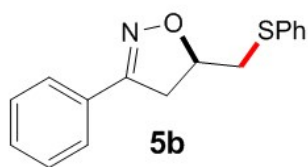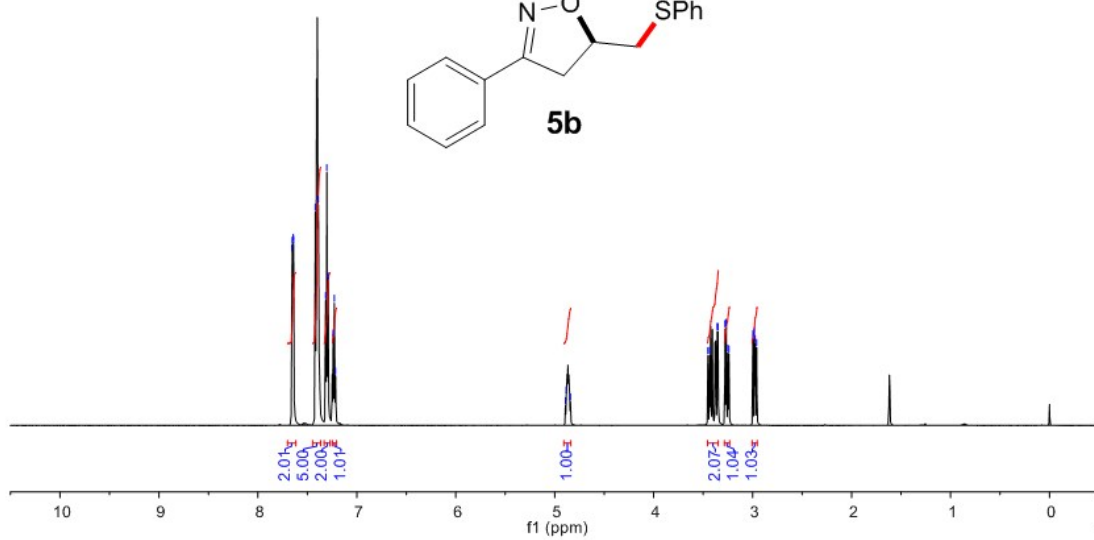

YSC-C

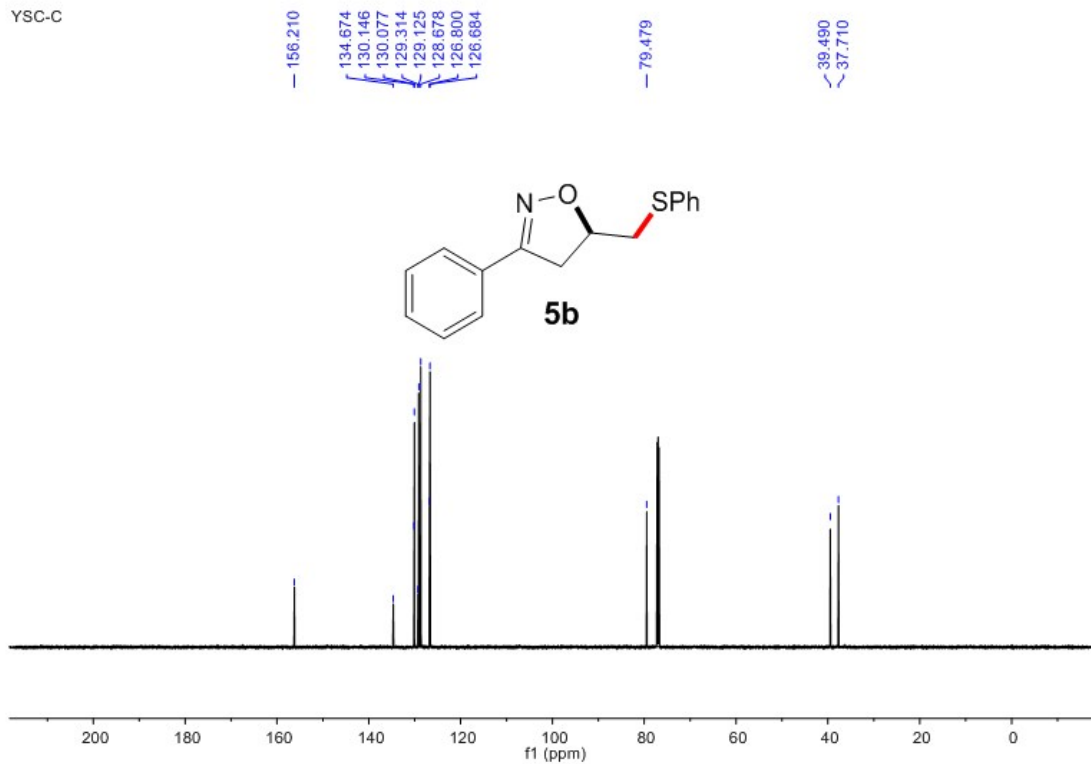

YSC-H

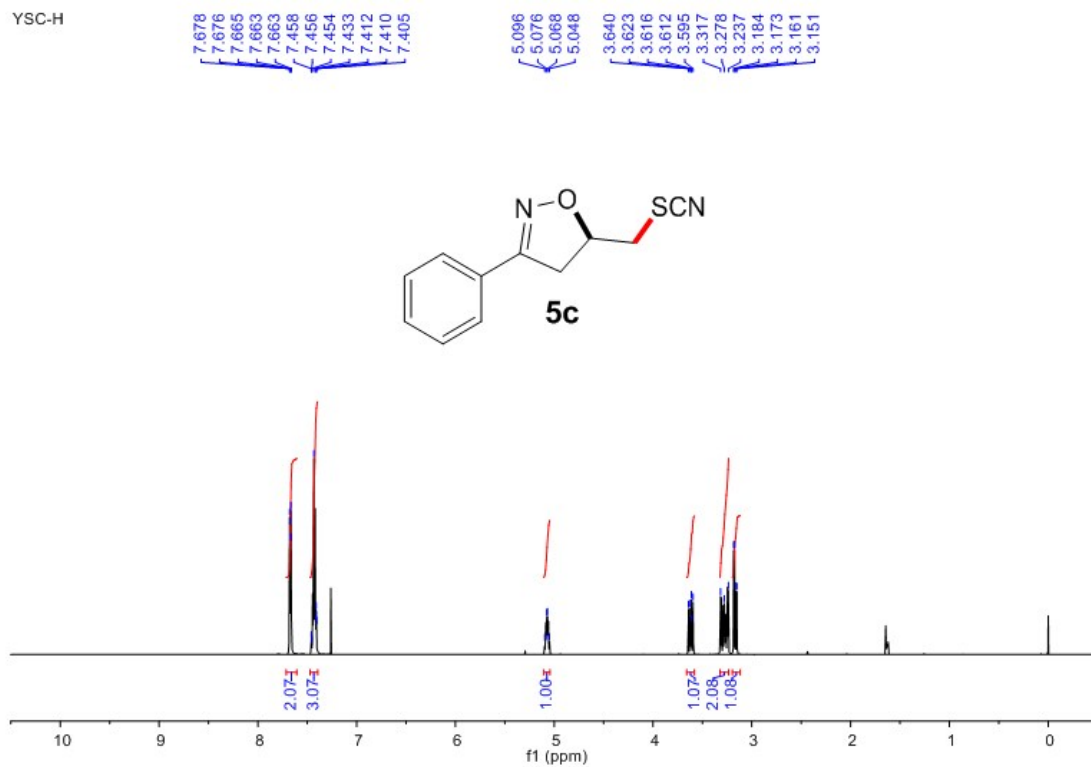

YSC-C

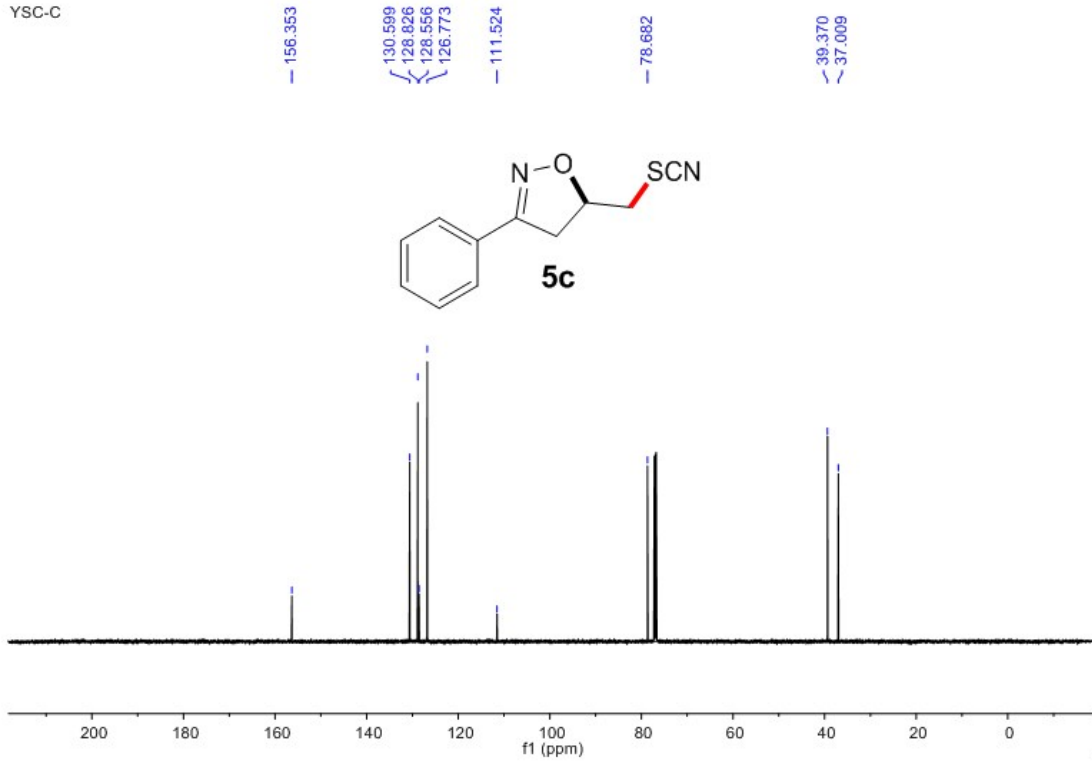

YSC-H

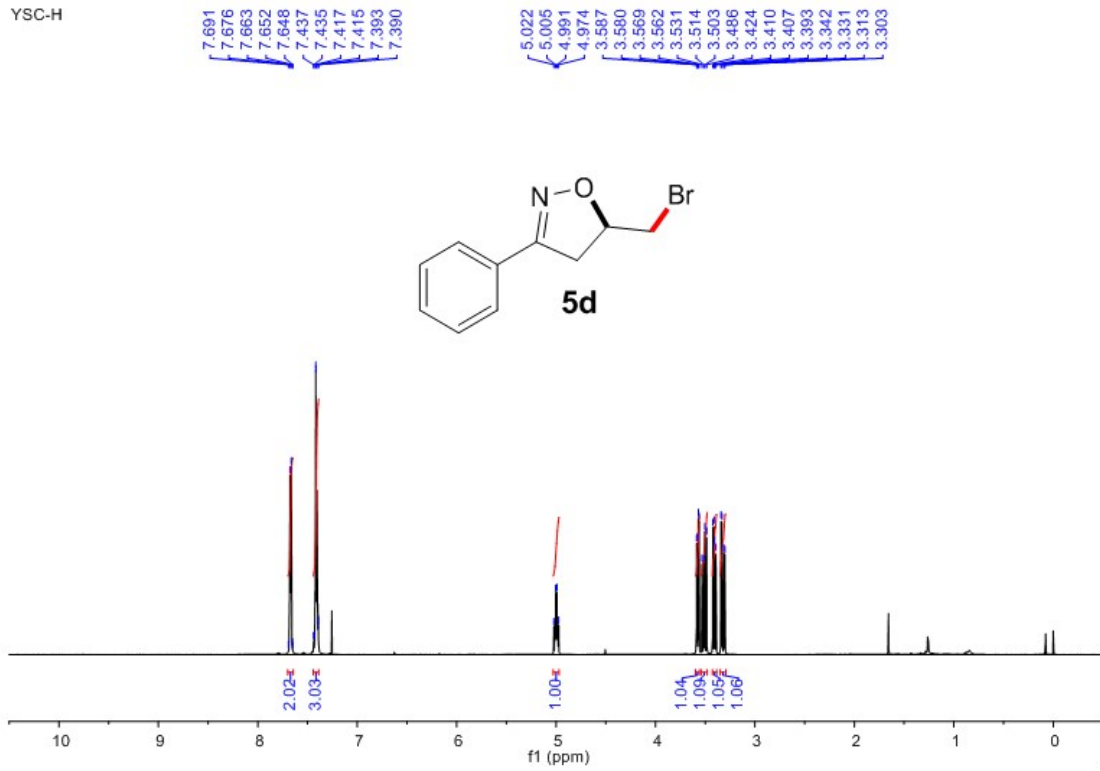



YSC-C

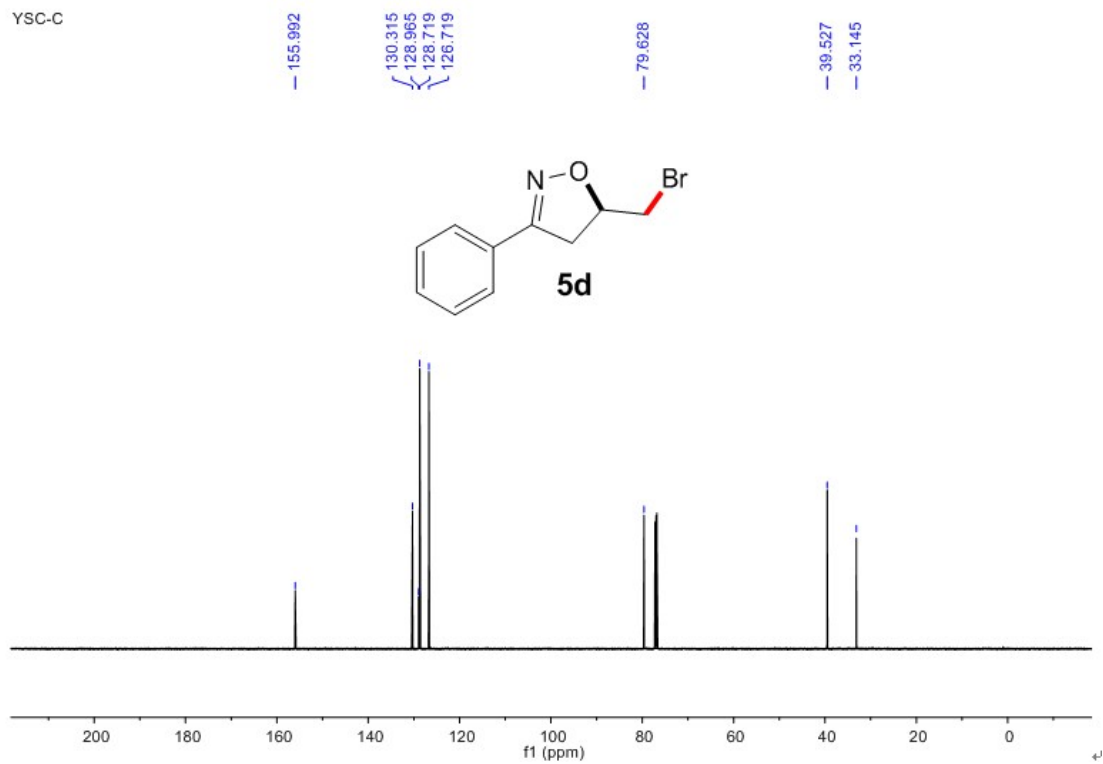

YSC-H

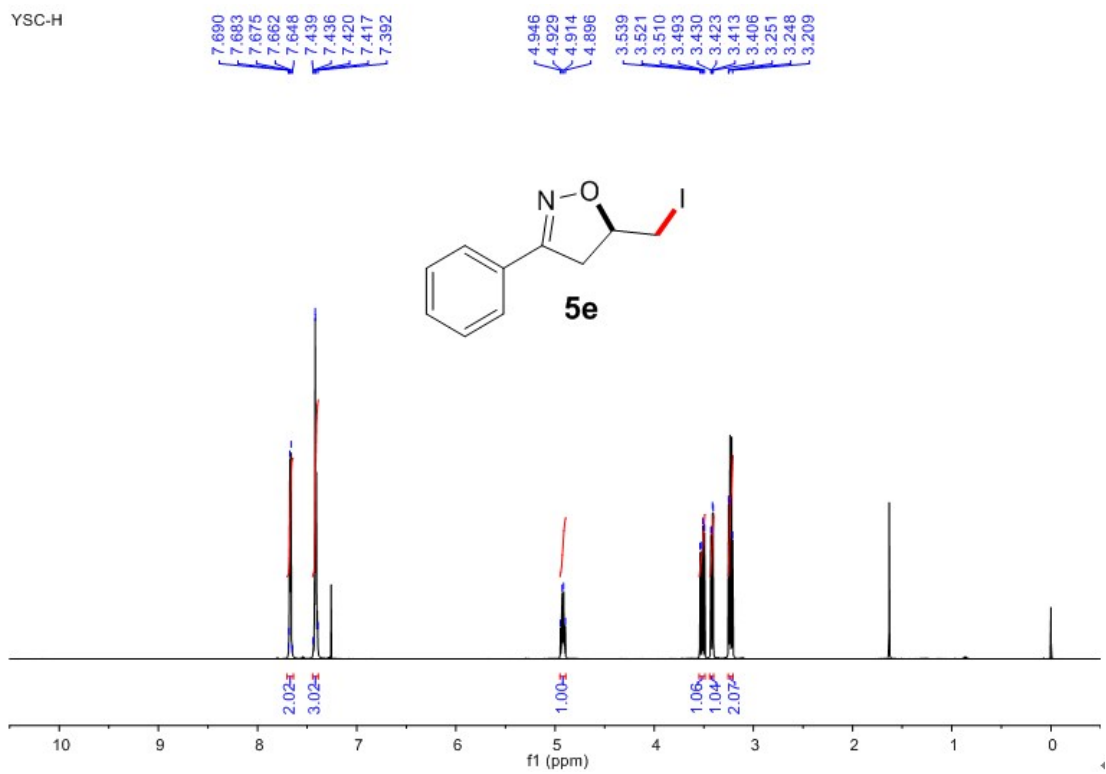

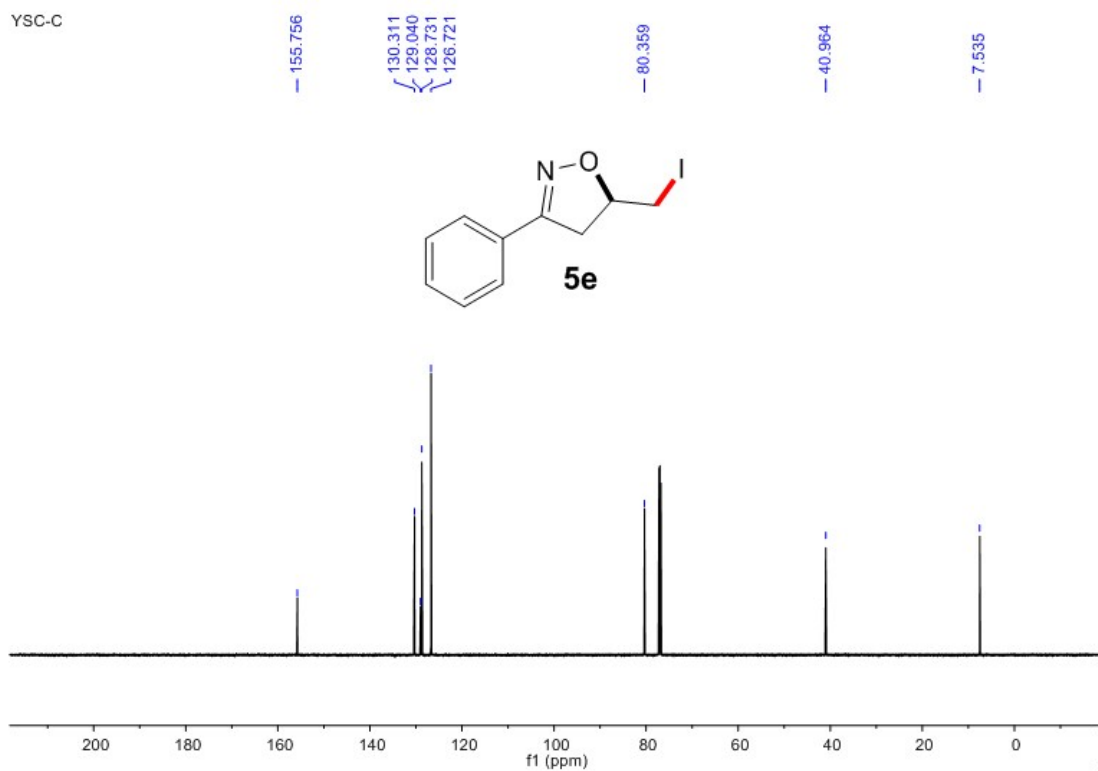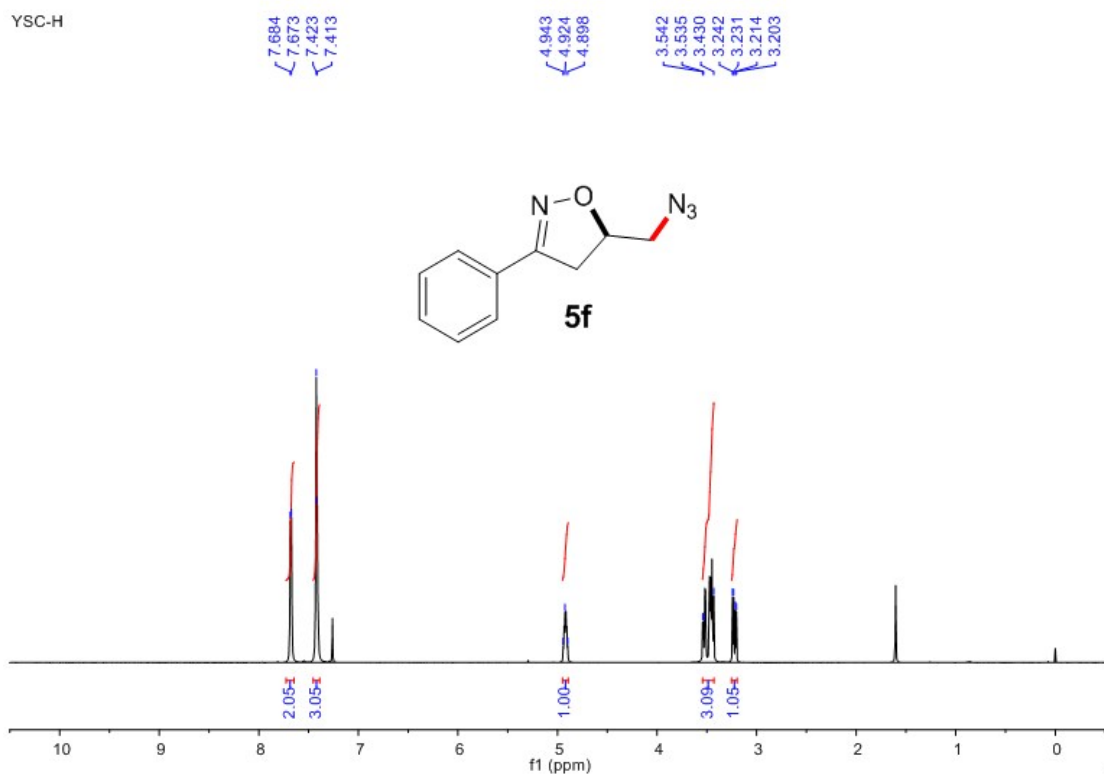

YSC-C

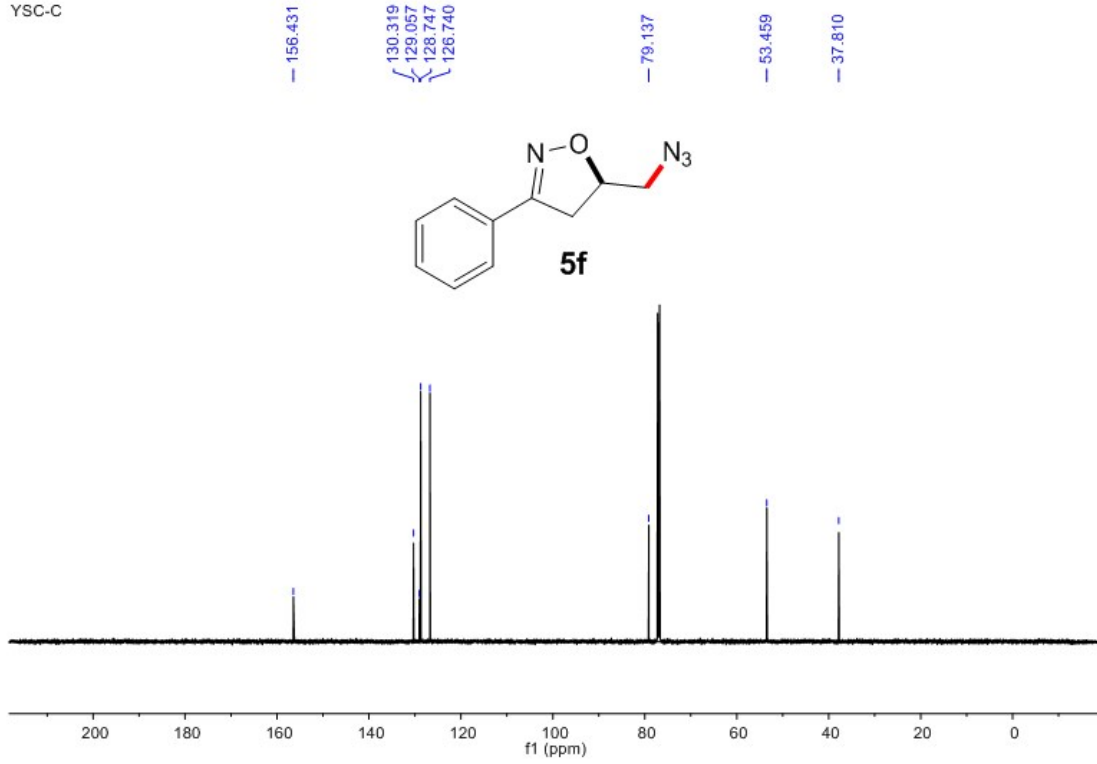

YSC-H

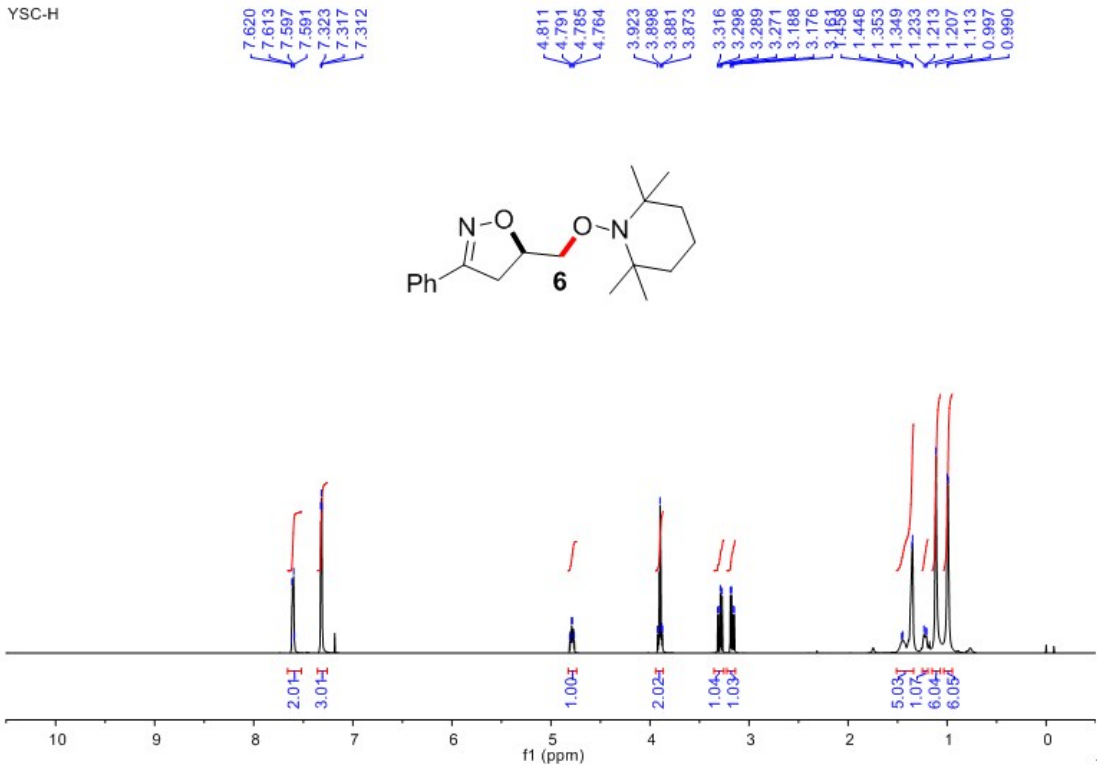

YSC-C

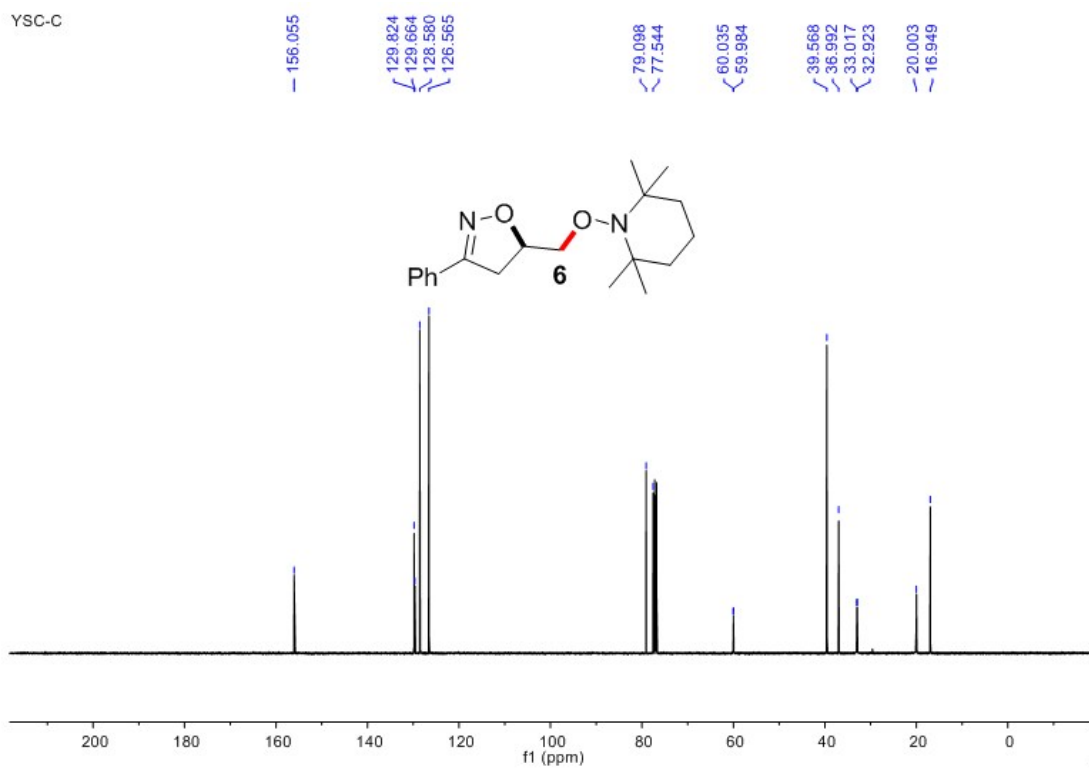

YSC-H

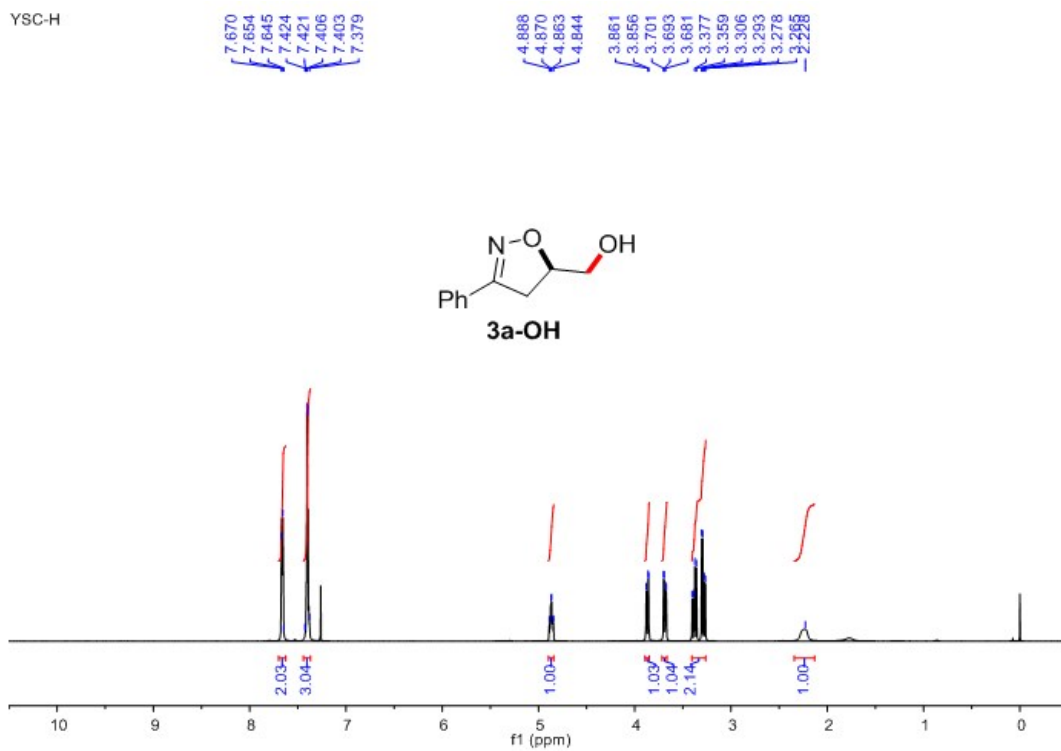

YSC-C

157.062

130.162  
129.286  
128.684  
126.685

81.220

63.646

36.302

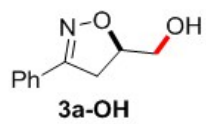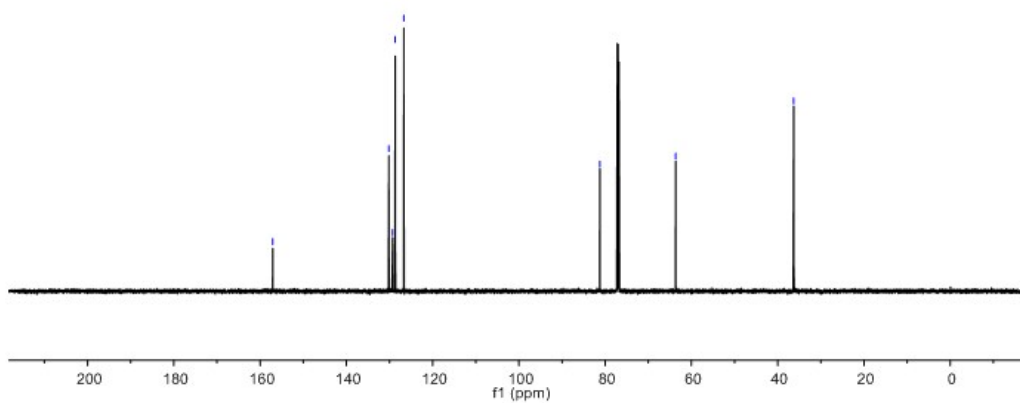

## 5. The crystallographic data for compounds 3a (CCDC number: 1921843)

### (1) Check CIF report

#### checkCIF/PLATON report

Structure factors have been supplied for datablock(s) t

THIS REPORT IS FOR GUIDANCE ONLY. IF USED AS PART OF A REVIEW PROCEDURE FOR PUBLICATION, IT SHOULD NOT REPLACE THE EXPERTISE OF AN EXPERIENCED CRYSTALLOGRAPHIC REFEREE.

No syntax errors found.    CIF dictionary    Interpreting this report

#### Datablock: t

---

|                        |                                            |                                  |                 |
|------------------------|--------------------------------------------|----------------------------------|-----------------|
| Bond precision:        | C-C = 0.0039 Å                             | Wavelength=0.71073               |                 |
| Cell:                  | a=5.7496 (11)                              | b=11.342 (2)                     | c=12.287 (3)    |
|                        | alpha=92.62 (3)                            | beta=95.69 (3)                   | gamma=94.25 (3) |
| Temperature:           | 295 K                                      |                                  |                 |
|                        | Calculated                                 | Reported                         |                 |
| Volume                 | 794.0 (3)                                  | 794.0 (3)                        |                 |
| Space group            | P -1                                       | P -1                             |                 |
| Hall group             | -P 1                                       | -P 1                             |                 |
| Moiety formula         | C17 H17 N O4 S                             | C17 H17 N O4 S                   |                 |
| Sum formula            | C17 H17 N O4 S                             | C17 H17 N O4 S                   |                 |
| Mr                     | 331.38                                     | 331.38                           |                 |
| Dx, g cm <sup>-3</sup> | 1.386                                      | 1.386                            |                 |
| Z                      | 2                                          | 2                                |                 |
| Mu (mm <sup>-1</sup> ) | 0.224                                      | 0.224                            |                 |
| F000                   | 348.0                                      | 348.0                            |                 |
| F000'                  | 348.41                                     |                                  |                 |
| h, k, lmax             | 6, 13, 14                                  | 6, 13, 14                        |                 |
| Nref                   | 2823                                       | 2808                             |                 |
| Tmin, Tmax             | 0.976, 0.989                               | 0.955, 0.994                     |                 |
| Tmin'                  | 0.971                                      |                                  |                 |
| Correction method=     | # Reported T Limits: Tmin=0.955 Tmax=0.994 |                                  |                 |
| AbsCorr =              | MULTI-SCAN                                 |                                  |                 |
| Data completeness=     | 0.995                                      | Theta(max) = 25.050              |                 |
| R(reflections)=        | 0.0466 ( 2154)                             | wR2(reflections)= 0.1222 ( 2808) |                 |
| S =                    | 1.034                                      | Npar= 209                        |                 |

---

The following ALERTS were generated. Each ALERT has the format  
**test-name\_ALERT\_alert-type\_alert-level.**  
Click on the hyperlinks for more details of the test.

### (2) The crystal structure of 3a

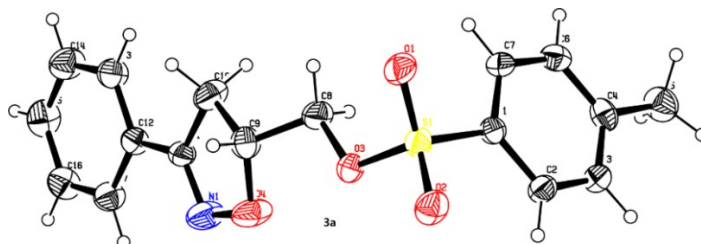

Supplement: c9ob02424g1.pdf [file c9ob02424g1.pdf]
